# Supplementary material
Source: MDPI journal article supplement (https://www.mdpi.com/2071-1050/12/4/1686)

# **Environmental and Economic Water Management in Shale Gas Extraction.**

**José A. Caballero<sup>\*a</sup>, Juan A. Labarta<sup>a</sup>, Natalia Quirante<sup>a</sup>, Alba Carrero-Parreño<sup>a</sup> and I.E.**

**Grossmann<sup>b</sup>**

## **Supplementary Information**

This document contains the supplementary material for the article «*Environmental and Economic Water Management in Shale Gas Extraction*». The document is organized as follows:

S.1. Comparison between thermal and membrane-based technologies for all the subcategories of impact using ReCiPe Midpoint (H)

S.2. Waste Water Management: Mathematical model Formulation.

- Nomenclature
- Waste Water Management Model
- Model Parameter: typical values
- References

S3. Case Study Data and Results

- Case Study Data
- Results for the maximum profit optimization
- Results for the minimum total LCIA (endpoint)
- Results for the minimum fresh water consumption

## S.1. Comparison between thermal and membrane-based technologies for all the subcategories of impact using ReCiPe Midpoint (H)

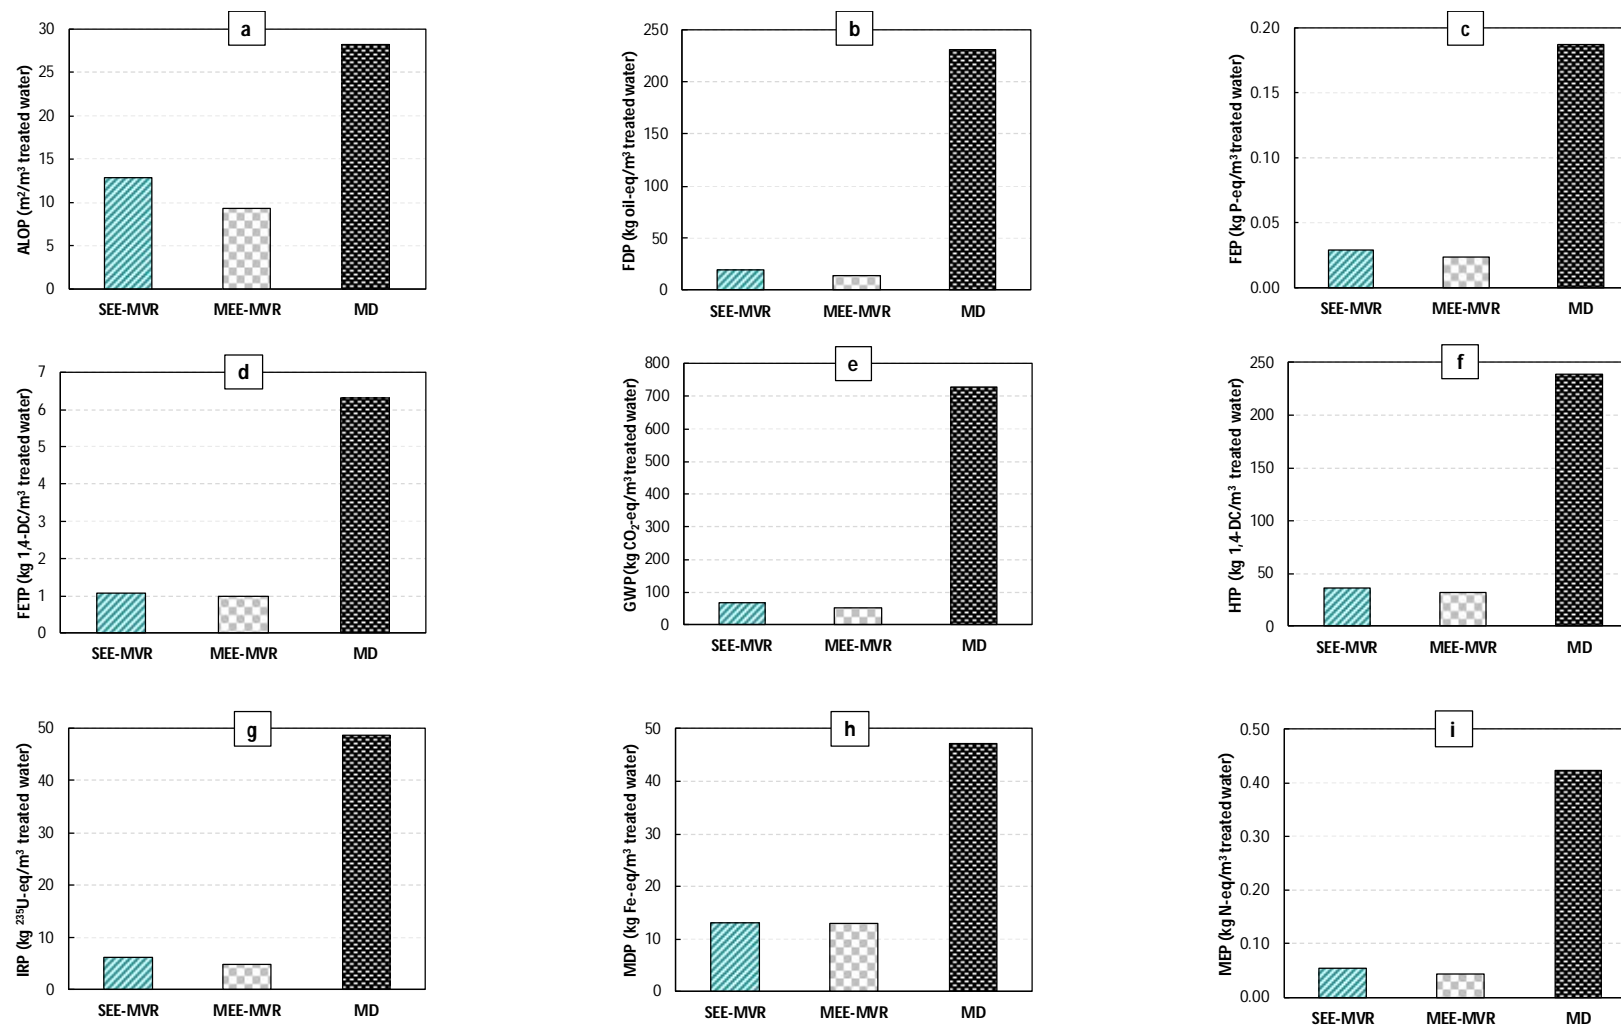

**Figure S.1. Comparison between thermal and membrane-based technologies for all the subcategories of impact using ReCiPe Midpoint (H).** a) Agricultural land occupation (ALOP), b) Fossil depletion (FDP), c) Freshwater eutrophication (FEP), d) Freshwater ecotoxicity (FETP), e) Global warming potential (GWP), f) Human toxicity (HTP), g) Ionizing radiation (IRP), h) Metal depletion (MDP), i) Marine eutrophication (MEP),

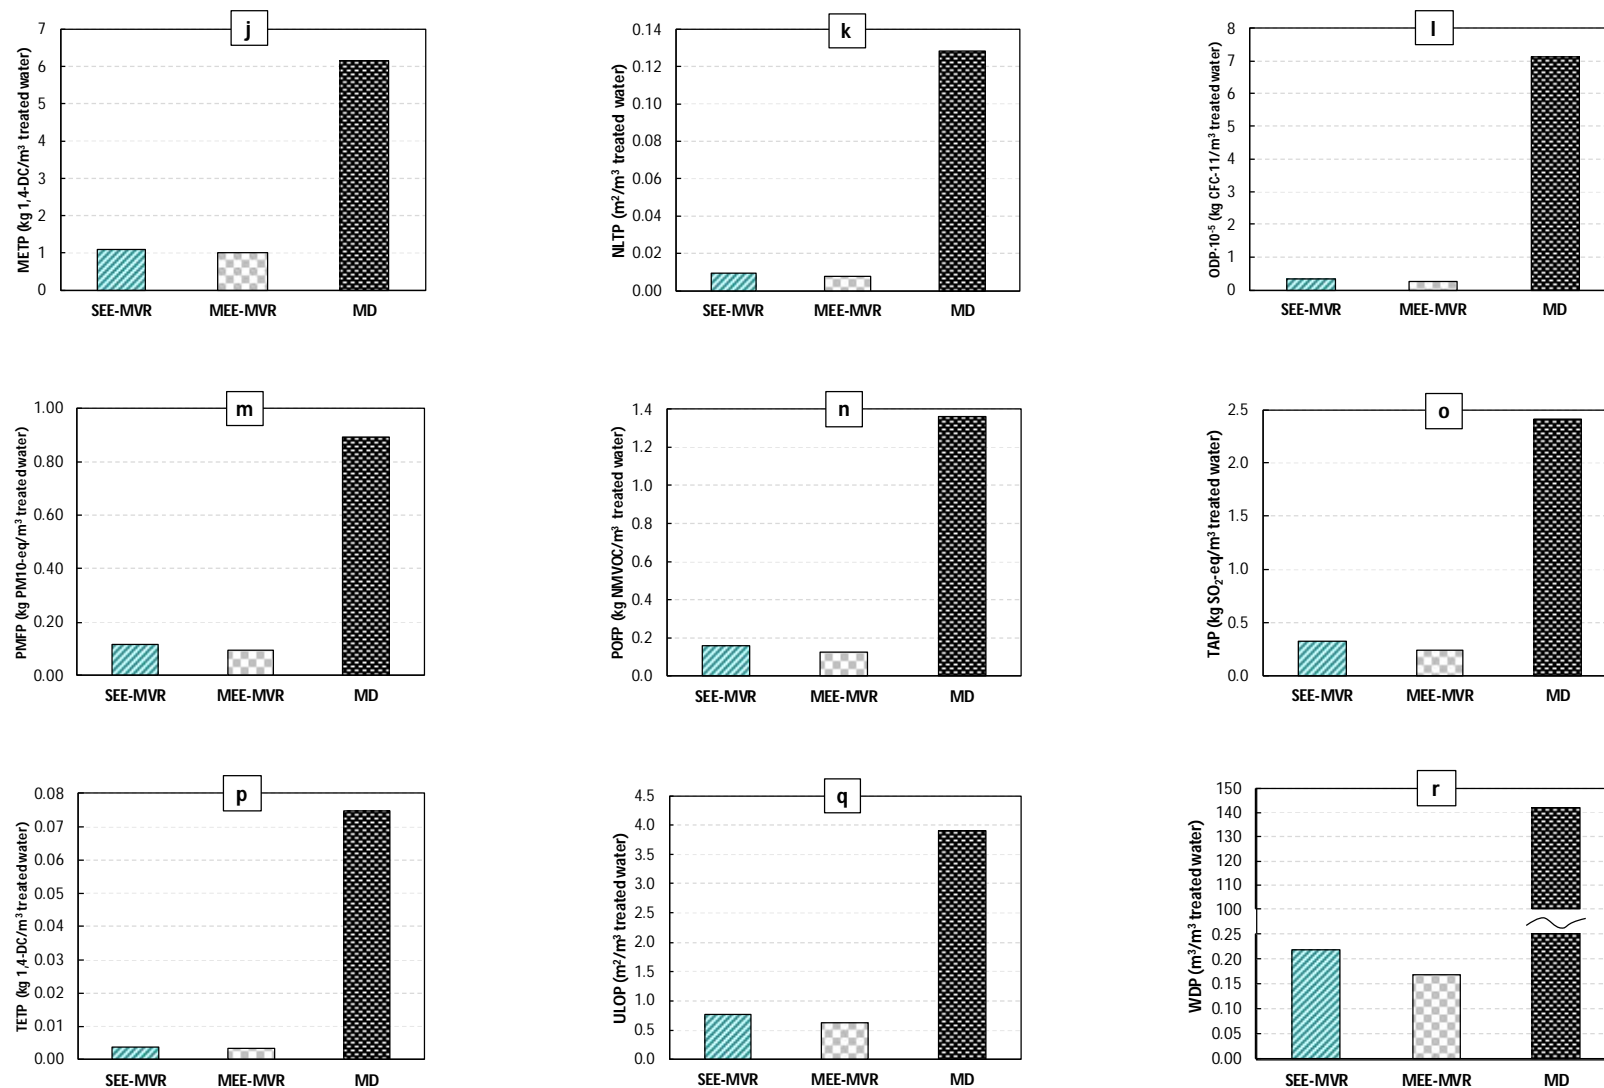

**Figure S.1.(cont) Comparison between thermal and membrane-based technologies for all the subcategories of impact using ReCiPe Midpoint (H)** j) Marine ecotoxicity (METP), k) Natural land transformation (NLTP), l) Ozone depletion (ODP), m) Particulate matter formation (PMFP), n) Photochemical oxidant formation (POFP), o) Terrestrial acidification (TAP), p) Terrestrial ecotoxicity (TETP), q) Urban land occupation (ULOP), and r) Water depletion (WDP).

## S.2. Waste Water Management: Mathematical model Formulation

The shale gas water management mathematical model is based on the model proposed by Carrero-Parreño et al. [1] The equations that define this problem are detailed below:

### NOMENCLATURE

#### Indexes

|      |                  |
|------|------------------|
| $c$  | Fracturing crew  |
| $d$  | Disposal well    |
| $f$  | Source           |
| $k$  | Capacity         |
| $n$  | Onsite treatment |
| $p$  | Wellpad          |
| $t$  | Time period      |
| $w$  | Well             |
| $wt$ | Treatment        |

#### Parameters

|                        |                                                                        |
|------------------------|------------------------------------------------------------------------|
| $D_{p,d}^{pad-dis}$    | Distance from wellpad $p$ to disposal well $d$                         |
| $D_{f,p}^{pad-source}$ | Distance from source $f$ to wellpad $p$                                |
| $D_p^{pad-off}$        | Distance from wellpad $p$ to offsite-treatment                         |
| $D_{p,pp}^{pad-pad}$   | Distance from wellpad $p$ to wellpad $pp$                              |
| $F_{t,p,w}^{well}$     | Flowback water forecast for well $w$ on wellpad $p$ in time period $t$ |
| $F_n^{on,LO}$          | Minimum onsite capacity for treatment $wt$                             |
| $F_n^{on,UP}$          | Maximum onsite capacity for treatment $wt$                             |
| $F_k^{cwt,UP}$         | Maximum centralize water treatment capacity $k$                        |
| $V_s^{UP}$             | Maximum storage volume of tank type $s$                                |
| $WD_w$                 | Water demand of well $w$                                               |
| $\alpha_k^{cwt}$       | Cost coefficient of centralized water treatment $k$                    |
| $\alpha^{des}$         | Onsite treatment recovery factor                                       |
| $\alpha_d^{dis}$       | Disposal coefficient cost coefficient for disposal $d$                 |
| $\alpha^{fr}$          | Friction reducer cost coefficient                                      |
| $\alpha^{ft}$          | Fracturing tank cost coefficient                                       |
| $\alpha^{fwt}$         | Fresh water tank cost coefficient                                      |
| $\alpha_p^{on}$        | Onsite desalination cost coefficient on wellpad $p$                    |
| $\alpha^{pre}$         | Pretreatment recovery factor                                           |

|                     |                                                                     |
|---------------------|---------------------------------------------------------------------|
| $\alpha^{rec}$      | Centralized water treatment recovery factor                         |
| $\alpha^{reuse}$    | Pretreatment cost coefficient aiming its reuse                      |
| $\alpha_f^{source}$ | Freshwater cost coefficient in freshwater source $f$                |
| $\alpha^{treat}$    | Pretreatment cost coefficient aiming its treatment                  |
| $\alpha^{truck}$    | Trucking cost coefficient                                           |
| $\beta^{ft}$        | Mobilize, demobilize and cleaning cost coefficient for storage tank |
| $\beta_p^{on}$      | Maintenance cost coefficient for onsite treatment on wellpad $p$    |
| $\tau_w$            | Time to fracture well $w$                                           |

### Binary variables

|                    |                                                                                                  |
|--------------------|--------------------------------------------------------------------------------------------------|
| $y_{t,p,w,c}^{hf}$ | Indicates if well $w$ on wellpad $p$ is stimulating using fracturing crew $c$ in time period $t$ |
| $y_{t,p,n}^{on}$   | Indicates if onsite treatment $n$ is used on wellpad $p$ in time period $t$                      |

### Variables

|                        |                                                                                           |
|------------------------|-------------------------------------------------------------------------------------------|
| $f_{t,p,k}^{cwt,in}$   | Inlet flow in centralized water treatment $k$ in time period $t$                          |
| $f_{t,k}^{cwt,out}$    | Outlet flow in centralized water treatment $k$ in time period $t$                         |
| $f_{t,p}^{dem}$        | Flowrate of water demand in wellpad $p$ in time period $t$                                |
| $f_{t,p}^{fresh}$      | Flowrate of freshwater used in hydraulic fracturing in wellpad $p$ in time period $t$     |
| $f_{t,p}^{imp}$        | Flowrate of impaired water used in hydraulic fracturing in wellpad $p$ in time period $t$ |
| $f_{t,p,pp}^{imp,pad}$ | Flowrate of impaired water from wellpad $p$ to wellpad $pp$ in time period $t$            |
| $f_{t,p,d}^{on,brine}$ | Brine flowrate after onsite desalination process in wellpad $p$ in time period $t$        |
| $f_{t,p}^{on,in}$      | Onsite desalination inflow in wellpad $p$ in time period $t$                              |
| $f_{t,p}^{on,out}$     | Onsite desalination outflow in wellpad $p$ in time period $t$                             |
| $f_{t,p}^{on,slud}$    | Sludge flowrate after onsite desalination process in wellpad $p$ in time period $t$       |
| $f_{t,p}^{pad}$        | Flowrate of produce water on wellpad $p$ in time period $t$                               |
| $f_{t,p}^{pre,in}$     | Onsite pretreatment inflow in wellpad $p$ in time period $t$                              |
| $f_{t,p}^{pre,out}$    | Onsite pretreatment outflow in wellpad $p$ in time period $t$                             |
| $f_{t,p,f}^{source}$   | Flowrate of freshwater from natural source $f$ to wellpad $p$ in time period $t$          |
| $f_{t,p,w}^{well}$     | Flowrate of produce water on well $w$ wellpad $p$ in time period $t$                      |
| $st_{t,p,s}$           | Level of water in tank type $s$ on wellpad $p$ in time period $t$                         |
| $y_{t,p,w}^{fb}$       | Indicates when the water starts to come out on well $w$ on wellpad $p$ in time period $t$ |

## WASTE WATER MANAGEMENT MODEL.

### *Assignment constraint*

**Eq. (S1)** guarantees that at the time period each well is going to fracture,

$$\sum_{t \in T} y_{t,p,w}^{hf} = 1 \quad \forall w \in RPW_p, p \in P \quad (S1)$$

where  $y_{t,p,w}^{hf}$  indicates that the well  $w$  in wellpad  $p$  is stimulating in time period  $t$ .

**Eq. (S2)** ensures that there is no overlap in drilling operations between different wells,

$$\sum_{w \in RPW_p} \sum_{t=t-\tau_w+1}^t y_{tt,p,w}^{hf} = 1 \quad \forall t \in T, p \in P \quad (S2)$$

where  $\tau_w$  is a parameter that indicates the time required to fracture well  $w$ .

### *Shale water recovered*

After fracturing a well, a portion of the freshwater injected returns to the wellhead,

$$y_{t,p,w}^{hf} = y_{t+\tau_w,p,w}^{fb} \quad t \leq T - \tau_w, \forall w \in RPW_p, p \in P \quad (S3)$$

where  $y_{t,p,w}^{fb}$  represents the time period when the flowback water comes out. The binary variable  $y_{t,p,w}^{fb}$  is treated as a continuous variable since its integrality is enforced by the Eq (S3)

The wastewater from each wellpad is calculated with **Eq. (S4)**,

$$f_{t,p,w}^{well} = \sum_{w \in RPW_p} \sum_{t=0}^{t \leq t-1} F_{t-t,p,w}^{well} \cdot y_{t+1,p,w}^{fb} \quad \forall t \in T, p \in P \quad (S4)$$

where  $F_{t,p,w}^{well}$  are parameters that indicate flowback flowrate.

**Eq. (S5)** describes the mass balance of flowback water collected from the wells belonging to wellpad  $p$ ,

$$f_{t,p}^{pad} = \sum_{w \in RPW_p} f_{t,p,w}^{well} \quad \forall t \in T, p \in P \quad (S5)$$

### Mass balance in storage tanks

The level of the fracturing tank in each time period ( $st_{t-1,p,s}$ ) depends on water stored in the previous time period, the flowback water recovered after the hydraulic fracturing ( $f_{t,p}^{pad}$ ), the water sent to another wellpad to be reused ( $f_{t,pp,p}^{imp,pad}$ ), the water sent to CWT ( $f_{t,p,k}^{cwt,in}$ ) or onsite ( $f_{t,p}^{onpre,in}$ ) treatment and the water sent to disposal ( $f_{t,p,d}^{dis}$ ). The mass balance in the storage tank is described in **Eq. (S6)**.

$$st_{t-1,p,s} + f_{t,p}^{pad} + \sum_{\substack{pp \in P \\ pp \neq p}} f_{t,pp,p}^{imp,pad} = st_{t,p,s} + \sum_{\substack{pp \in P \\ pp \neq p}} f_{t,p,pp}^{imp,pad} + f_{t,p}^{onpre,in} + \sum_{k \in K} f_{t,p,k}^{cwt,in} + \sum_{d \in D} f_{t,p,d}^{dis} \quad \forall t \in T, p \in P, s \in \{s1\} \quad (S6)$$

The fresh water is also stored in portable tanks. The mass balance is detailed in **Eq. (S7)**.

$$st_{t-1,p,s} + \sum_{f \in F} f_{t,p,f}^{source} = st_{t,p,s} + f_{t,p}^{fresh} \quad \forall t \in T, p \in P, s \in \{s2\} \quad (S7)$$

The volume of the tank ( $v_s$ ) is calculated by **Eq. (S8)**,

$$st_{t,p,s} + \theta_{t,p,s} \leq v_s \quad \forall t \in T, p \in P, s \in S \quad (S8)$$

where  $\theta_{t,p,s}$  represents the inlet water in the storage tank divided by the number of days in a week. This variable is introduced due to as the time horizon is discretized into weeks, the storage tank should handle the inlet water that comes from one day.

The volume of the tank is bounded by the maximum storage capacity allowed in a wellpad per week.

$$v_s \leq V_s^{UP} \quad \forall s \in S \quad (S9)$$

### Water demand

The water demand per wellpad ( $f_{t,p}^{dem}$ ) can be provided by a mixture of impaired water ( $f_{t,p}^{imp}$ ) or fresh ( $f_{t,p}^{fresh}$ ),

$$f_{t,p}^{dem} = f_{t,p}^{fresh} + f_{t,p}^{imp} \quad \forall t \in T, p \in P \quad (S10)$$

The amount of water demand per well is given by **Eq. (S11)**,

$$f_{t,p}^{dem} = \sum_{w \in RPW_p} f_{t,p,w}^{dem} \quad \forall t \in T, p \in P \quad (S11)$$

**Eq. (S12)** indicates that the water when the well is going to be drilled, must be greater or equal than the well water demand ( $WD_w$ ),

$$f_{t,p,w}^{dem} \geq WD_w \cdot \sum_{c \in C} y_{t,p,w,c}^{hf} \quad \forall t \in T, w \in RPW_p, p \in P \quad (S12)$$

### **Onsite treatment**

Onsite pretreatment mass balance is described in **Eq. (S13)**,

$$f_{t,p}^{pre,out} + f_{t,p}^{on,slud} = f_{t,p}^{pre,in} \quad \forall t \in T, p \in P \quad (S13)$$

The recovery factor ( $\alpha^{pre}$ ) is used to model the relationship between the inlet and outlet streams.

$$f_{t,p}^{pre,out} = \alpha^{pre} \cdot f_{t,p}^{pre,in} \quad \forall t \in T, p \in P \quad (S14)$$

The outlet pretreated water can be used as a fracturing fluid ( $f_{t,p}^{imp}$ ) or/and can be sent to onsite desalination treatment ( $f_{t,p}^{on,in}$ ),

$$f_{t,p}^{pre,out} = f_{t,p}^{imp} + f_{t,p}^{on,in} \quad \forall t \in T, p \in P \quad (S15)$$

Mass balance around onsite desalination technology is given by **Eq. (S16)**,

$$f_{t,p}^{on,out} + f_{t,p}^{on,brine} = f_{t,p}^{on,in} \quad \forall t \in T, p \in P \quad (S16)$$

Again, the relation between inlet and outlet mass flowrate in onsite desalination unit is addressed by using the recovery factor ( $\alpha^{on}$ ),

$$f_{t,p}^{on,out} = \alpha^{on} \cdot f_{t,p}^{on,in} \quad \forall t \in T, p \in P \quad \forall t \in T, p \in P \quad (S17)$$

The following equation **Eq. (S18)** represents the maximum and minimum capacity of the desalination treatment.

$$F^{on,LO} \cdot y_{t,p}^{on} \leq f_{t,p}^{on,in} \leq F^{on,UP} \cdot y_{t,p}^{on} \quad \forall t \in T, p \in P \quad (S18)$$

### **Centralized water treatment**

**Eq. (S19)** shows the connection between inlet and outlet streams, and **Eq. (S20)** limits the inlet water of CWT  $k$  with the maximum capacity allowed.

$$f_{t,k}^{cwt,out} = \alpha_k^{off} \cdot \sum_{p \in P} f_{t,p,k}^{cwt,in} \quad \forall t \in T, k \in K \quad (S19)$$

$$\sum_{p \in P} f_{t,p,k}^{cwt,in} \leq F_k^{cwt,UP} \quad \forall t \in T, k \in K \quad (S20)$$

### Objective function

Different objective functions have been considered depending on the case studied. We solve a multi-objective optimization problem considering two objective functions (**Eq. (S21)** and **Eq. (S22)**). Specifically, the gross profit to be maximized includes revenue from shale gas and expenses for wellpad construction and preparation, shale gas production and water-related costs. The life cycle impact assessment minimizes environmental impacts associated with water activities.

$$\begin{aligned} \max : GP = & \sum_{t \in T} \sum_{p \in P} \sum_{w \in RPW_p} \sum_{tt=0}^{tt \leq t-1} F_{t-tt,p,w}^{gas} \cdot y_{tt+1,p,w}^{fb} \cdot \alpha_t^{gas} \\ & - \sum_{t \in T} \sum_{p \in P} \left[ \sum_{d \in D} \alpha_d^{dis} \cdot f_{t,p,d}^{dis} \right. \\ & + \sum_{w \in RPW_p} (\alpha^{drill} \cdot y_{t,p,w}^{hf} + \alpha^{prod} \cdot f_{t,p,w}^{gas}) \\ & + \sum_{f \in F} \alpha_f^{source} \cdot f_{t,p,f}^{source} \\ & + \alpha^{fr} \cdot f_{t,p}^{imp} \\ & + \alpha^{reuse} \cdot f_{t,p}^{imp} + \alpha^{treat} \cdot f_{t,p}^{on,in} + \alpha_p^{on} \cdot f_{t,p}^{on,in} + \beta_p^{on} \cdot y_p^{on} \\ & + \sum_{k \in K} \alpha_k^{cwt} \cdot f_{t,p,k}^{cwt,in} \\ & + \left( \sum_{f \in F} f_{t,p,f}^{source} \cdot D_{f,p}^{pad-source} + \sum_{k \in K} f_{t,k}^{cwt,in} \cdot D_{p,k}^{pad-cwt} + \sum_{pp \in P} f_{t,p,pp}^{pad,imp} \cdot D_{p,pp}^{pad-pad} \right) \cdot \alpha_p^{trans} \Big] \\ & + \alpha^{fw} \cdot v_{fw} + \alpha^{ft} \cdot v_{ft} + \beta^{ft} \end{aligned} \quad (S21)$$

$$\begin{aligned} \min : LCIA = & \sum_{t \in T} \sum_{p \in P} \left[ \sum_{f \in F} \sigma^{source} \cdot f_{t,p,f}^{source} \right. \\ & + \sigma^{on} \cdot f_{t,p}^{on,in} \\ & + \sum_{k \in K} \alpha_k^{cwt} \cdot f_{t,p,k}^{cwt,in} \\ & + \left. \left( \sum_{f \in F} f_{t,p,f}^{source} \cdot D_{f,p}^{pad-source} + \sum_{k \in K} f_{t,k}^{cwt,in} \cdot D_{p,k}^{pad-cwt} + \sum_{pp \in P} f_{t,p,pp}^{pad,imp} \cdot D_{p,pp}^{pad-pad} \right) \cdot \sigma^{trans} \right] \end{aligned} \quad (S22)$$

## Model Parameters: typical values

All data related with the case study is shown in the section (S??). However, in this section we show typical values for costs and other relevant parameter and the relevant references.

**Table S.1. Cost coefficients.**

| Parameter                                                     | Value       | Unit                    | Ref   |
|---------------------------------------------------------------|-------------|-------------------------|-------|
| Disposal cost ( $\alpha_d^{dis}$ )                            | 90 - 120    | \$/m <sup>3</sup>       | [2]   |
| Truck cost ( $\alpha^{truck}$ )                               | 0.15        | \$/km/m <sup>3</sup>    | [2]   |
| Fracturing tank cost ( $\alpha^{fl}; \beta^{fl}$ )            | 4.37; 52390 | \$/ m <sup>3</sup> ; \$ | *     |
| Freshwater tank cost ( $\alpha^{fwt}$ )                       | 0.59        | \$/ m <sup>3</sup>      | *     |
| Pretreatment cost ( $\alpha^{reuse}, \alpha^{treat}$ )        | 0.8 - 2.0   | \$/m <sup>3</sup>       | [3]   |
| Desalination cost ( $\alpha_p^{ondes}$ )                      | 10 - 25     | \$/m <sup>3</sup>       | [4,5] |
| Demobilize, mobilize and clean out cost ( $\beta_p^{ondes}$ ) | 650 - 850   | \$/week                 | *     |
| Centralized water treatment ( $\alpha_k^{cwt}$ )              | 42 - 84     | \$/m <sup>3</sup>       | [2]   |
| Friction reducer cost ( $\alpha^{fr}$ )                       | 0.18 - 0.30 | \$/m <sup>3</sup>       | *     |
| Freshwater withdrawal cost ( $\alpha_f^{source}$ )            | 1.76 - 3.50 | \$/m <sup>3</sup>       | [6]   |

\* Provided by a company

**Table S.2. Model parameters.**

| Parameter          | Value          | Unit                              | Ref |
|--------------------|----------------|-----------------------------------|-----|
| $V_s^{UP}$         | 60,000         | m <sup>3</sup>                    | *   |
| $F_{t,p,w}^{well}$ | 2,400 - 9,300  | m <sup>3</sup> week <sup>-1</sup> | [7] |
| $f^{on,UP}$        | 4,000          | m <sup>3</sup> week <sup>-1</sup> | *   |
| $f_k^{cwt,UP}$     | 16,700         | m <sup>3</sup> week <sup>-1</sup> | *   |
| $WD_w$             | 7,500 - 37,000 | m <sup>3</sup> week <sup>-1</sup> | [7] |
| $\tau_w$           | 1 - 5          | weeks                             | [7] |

\* Provided by a shale gas company

## References

1. Carrero-Parreño, A.; Reyes-Labarta, J.A.; Salcedo-Díaz, R.; Ruiz-Femenia, R.; Onishi, V.C.; Caballero, J.A.; Grossmann, I.E. Holistic Planning Model for Sustainable Water Management in the Shale Gas Industry. *Ind. Eng. Chem. Res.* **2018**, *57*, 13131–13143.
2. Yang, L.; Grossmann, I.E.; Mauter, M.S.; Dilmore, R.M. Investment optimization model for freshwater acquisition and wastewater handling in shale gas production. *AIChE J.* **2015**, *61*, 1770–1782.
3. Carrero-Parreño, A.; Onishi, V.C.; Salcedo-Díaz, R.; Ruiz-Femenia, R.; Fraga, E.S.; Caballero, J.A.; Reyes-Labarta, J.A. Optimal Pretreatment System of Flowback Water from Shale Gas Production. *Ind. Eng. Chem. Res.* **2017**, *56*, 4386–4398.
4. Carrero-Parreño, A.; Onishi, V.C.; Ruiz-Femenia, R.; Salcedo-Díaz, R.; Caballero, J.A.; Reyes-Labarta, J.A. Optimization of multistage membrane distillation system for treating shale gas produced water. *Desalination* **2019**, *460*, 15–27.
5. Onishi, V.C.; Carrero-Parreño, A.; Reyes-Labarta, J.A.; Fraga, E.S.; Caballero, J.A. Desalination of shale gas produced water: A rigorous design approach for zero-liquid discharge evaporation systems. *J. Clean. Prod.* **2017**, *140*, 1399–1414.
6. Yang, L.; Grossmann, I.E.; Manno, J. Optimization models for shale gas water management. *AIChE J.* **2014**, *60*, 3490–3501.
7. EPA *Technical Development Document for the Effluent Limitations Guidelines and Standards for the oil and Gas Extraction Point Source Category.*; 2016;

# SHALE GAS WATER MANAGEMENT

=====

Institute of Chemical Process Engineering

University of Alicante

LCA + Water Management Report

=====

## BEST GLOBAL ENVIRONMENTAL ALTERNATIVE

### RESULTS FOR THE CASE STUDY IN THE PAPER:

«Environmental and Economic Water Management in Shale Gas Extraction»

### CONTENTS

MODEL STATISTICS

RESULTS: SCHEDULING

RESULTS: Storage Tanks. Volumes and Levels

RESULTS: Main Flows

RESULTS: Global data water utilization

RESULTS: Time dependent Water flow charts

RESULTS : Gas Production Charts

RESULTS : Cost Distribution

RESULTS : LCA

### MODEL STATISTICS

|                              |   |          |
|------------------------------|---|----------|
| Number of Variables          | : | 11373.0  |
| Number of Discrete Variables | : | 1165.0   |
| Number of Equations          | : | 9068.0   |
| Number of non-zero elements  | : | 112950.0 |
| Number of Iterations         | : | 940439.0 |
| CPU Generation Time (s)      | : | 0.6090   |
| CPU Solution Time (s)        | : | 83.5310  |
| Model Objective Value        | : | 0.5189   |

RESULTS: SCHEDULING

The different wells must be schedule according to the following table.

|                       |                         |    |                           |    |
|-----------------------|-------------------------|----|---------------------------|----|
| Well 1 in well pad 1  | Starts fracking at week | 37 | and ends fracking at week | 42 |
| Well 2 in well pad 1  | Starts fracking at week | 21 | and ends fracking at week | 26 |
| Well 3 in well pad 1  | Starts fracking at week | 32 | and ends fracking at week | 37 |
| Well 4 in well pad 1  | Starts fracking at week | 6  | and ends fracking at week | 11 |
| Well 5 in well pad 1  | Starts fracking at week | 1  | and ends fracking at week | 6  |
| Well 6 in well pad 1  | Starts fracking at week | 11 | and ends fracking at week | 16 |
| Well 7 in well pad 1  | Starts fracking at week | 27 | and ends fracking at week | 32 |
| Well 8 in well pad 1  | Starts fracking at week | 16 | and ends fracking at week | 21 |
| Well 9 in well pad 2  | Starts fracking at week | 31 | and ends fracking at week | 36 |
| Well 10 in well pad 2 | Starts fracking at week | 6  | and ends fracking at week | 11 |
| Well 11 in well pad 2 | Starts fracking at week | 22 | and ends fracking at week | 27 |
| Well 12 in well pad 2 | Starts fracking at week | 17 | and ends fracking at week | 22 |
| Well 13 in well pad 2 | Starts fracking at week | 11 | and ends fracking at week | 16 |
| Well 14 in well pad 2 | Starts fracking at week | 1  | and ends fracking at week | 6  |
| Well 15 in well pad 3 | Starts fracking at week | 16 | and ends fracking at week | 21 |
| Well 16 in well pad 3 | Starts fracking at week | 33 | and ends fracking at week | 38 |
| Well 17 in well pad 3 | Starts fracking at week | 6  | and ends fracking at week | 11 |
| Well 18 in well pad 3 | Starts fracking at week | 1  | and ends fracking at week | 6  |
| Well 19 in well pad 3 | Starts fracking at week | 43 | and ends fracking at week | 48 |
| Well 20 in well pad 3 | Starts fracking at week | 38 | and ends fracking at week | 43 |
| Well 21 in well pad 4 | Starts fracking at week | 43 | and ends fracking at week | 48 |
| Well 22 in well pad 4 | Starts fracking at week | 21 | and ends fracking at week | 26 |
| Well 23 in well pad 4 | Starts fracking at week | 16 | and ends fracking at week | 21 |
| Well 24 in well pad 4 | Starts fracking at week | 1  | and ends fracking at week | 6  |
| Well 25 in well pad 4 | Starts fracking at week | 6  | and ends fracking at week | 11 |
| Well 26 in well pad 4 | Starts fracking at week | 11 | and ends fracking at week | 16 |
| Well 27 in well pad 4 | Starts fracking at week | 26 | and ends fracking at week | 31 |

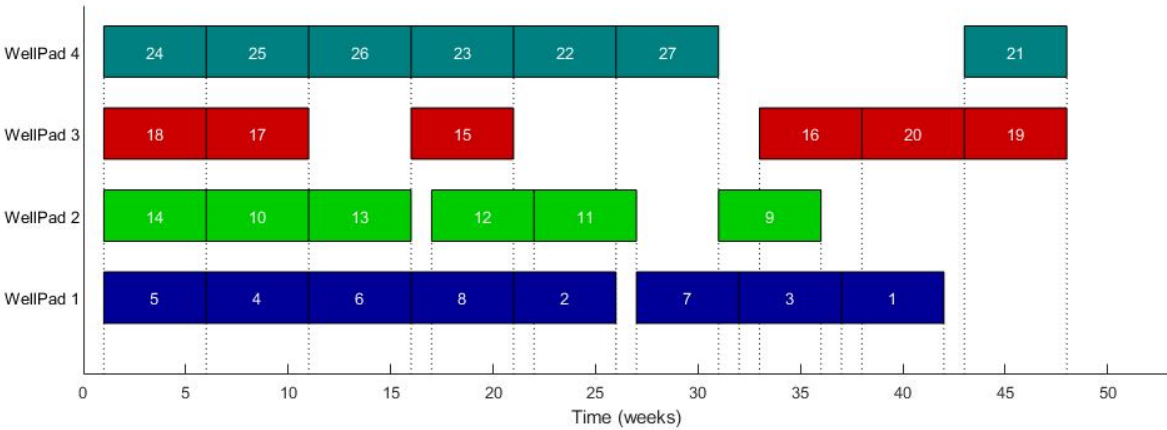

RESULTS: Storage Tanks. Volumes and Levels

Volume of fresh water tanks (m3)

|          |     |         |
|----------|-----|---------|
| Well Pad | 1 : | 50000.0 |
| Well Pad | 2 : | 50000.0 |
| Well Pad | 3 : | 50000.0 |
| Well Pad | 4 : | 50000.0 |

Volume of waste water tanks (m3)

|          |     |         |
|----------|-----|---------|
| Well Pad | 1 : | 50000.0 |
| Well Pad | 2 : | 50000.0 |
| Well Pad | 3 : | 50000.0 |
| Well Pad | 4 : | 50000.0 |

FRESH Water Tank Level

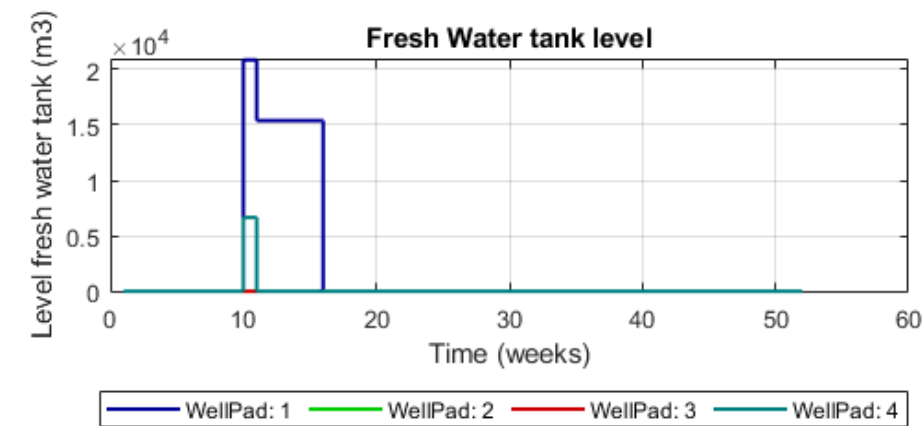

WASTE Water Tank Level

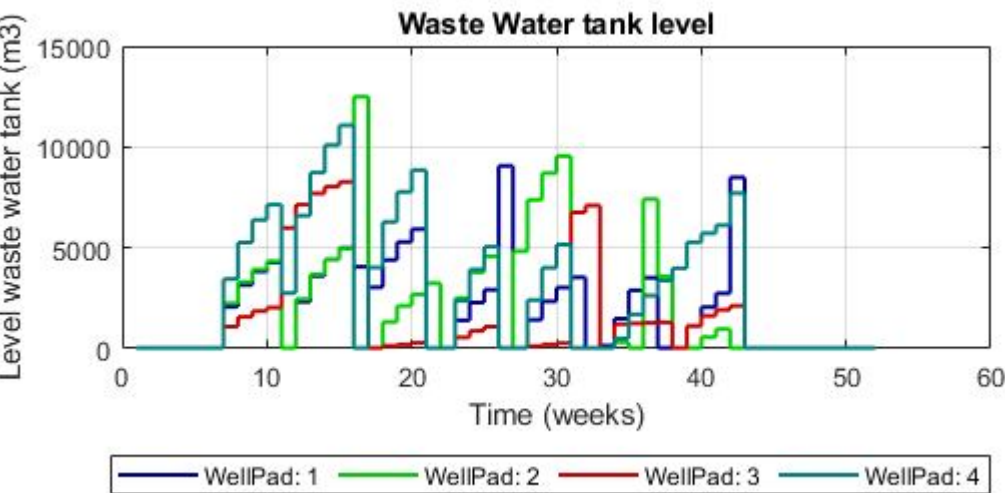

## RESULTS: Main Flows

Total Flow from each water source to each Well Pad (m3)

|            | Well Pad 1 | Well Pad 2 | Well Pad 3 | Well Pad 4 | Total    |
|------------|------------|------------|------------|------------|----------|
| Source 1 : | 20847.9    | 0.0        | 0.0        | 6655.2     | 27503.0  |
| Source 2 : | 0.0        | 0.0        | 0.0        | 0.0        | 0.0      |
| Source 3 : | 24907.5    | 35563.9    | 20275.2    | 31464.0    | 122110.6 |
| Total :    | 45755.4    | 35563.9    | 20275.2    | 38119.2    |          |

Total fresh water demand of each well pad (m3)

|              |          |
|--------------|----------|
| Well Pad 1 : | 126000.0 |
| Well Pad 2 : | 108000.0 |
| Well Pad 3 : | 72000.0  |
| Well Pad 4 : | 132000.0 |
| Total :      | 438000.0 |

Total flowback water in each well pad (m3)

|              |          |
|--------------|----------|
| Well Pad 1 : | 91634.5  |
| Well Pad 2 : | 78614.5  |
| Well Pad 3 : | 38240.0  |
| Well Pad 4 : | 120850.0 |
| Total :      | 329339.1 |

Total flowback recycled by each well pad (m3)

|              |          |
|--------------|----------|
| Well Pad 1 : | 80244.6  |
| Well Pad 2 : | 72436.1  |
| Well Pad 3 : | 51724.8  |
| Well Pad 4 : | 93880.8  |
| Total :      | 298286.4 |

Total flow treated on-site in each well pad(m3)

|              |         |
|--------------|---------|
| Well Pad 1 : | 4022.8  |
| Well Pad 2 : | 1185.4  |
| Well Pad 3 : | 8524.1  |
| Well Pad 4 : | 7440.2  |
| Total :      | 21172.5 |

Total flow sent to a C.W.T by each well pad(m3)

|              |     |
|--------------|-----|
| Well Pad 1 : | 0.0 |
| Well Pad 2 : | 0.0 |
| Well Pad 3 : | 0.0 |
| Well Pad 4 : | 0.0 |
| Total :      | 0.0 |

Total flow sent to disposal by each well pad(m3)

|              |     |
|--------------|-----|
| Well Pad 1 : | 0.0 |
| Well Pad 2 : | 0.0 |
| Well Pad 3 : | 0.0 |
| Well Pad 4 : | 0.0 |
| Total :      | 0.0 |

Total flow recycled between well pads (m3)

|              | Well Pad 1 | Well Pad 2 | Well Pad 3 | Well Pad 4 |
|--------------|------------|------------|------------|------------|
| Well Pad 1 : | 0.0        | 6014.3     | 15117.8    | 4087.2     |
| Well Pad 2 : | 10032.5    | 0.0        | 5153.6     | 7407.1     |
| Well Pad 3 : | 2424.7     | 1376.7     | 0.0        | 2919.8     |
| Well Pad 4 : | 8001.2     | 12486.2    | 10322.1    | 0.0        |

RESULTS: Global data water utilization

|                                        |            |
|----------------------------------------|------------|
| Total water demanded by Well Pads (m3) | : 438000.0 |
| Total fresh water consumption (m3)     | : 139713.6 |
| Total flowback water (m3)              | : 329339.1 |
| Total flowback water recycled (m3)     | : 298286.4 |
| Total sludge generated (m3)            | : 9880.2   |
| Total water desalinated on-site (m3)   | : 21172.5  |
| Total water desalinated off-site (m3)  | : 0.0      |
| Total water send to disposal (m3)      | : 0.0      |
| Percentage of fresh water saved (%)    | : 68.1     |

RESULTS: Time dependent Water flow charts

Total fresh water consumed in each wellpad

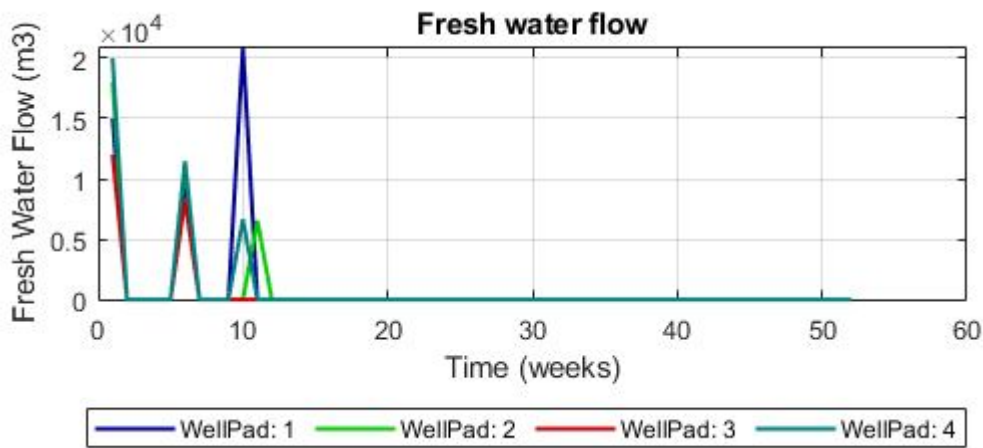

Total flowback water produced in each wellpad

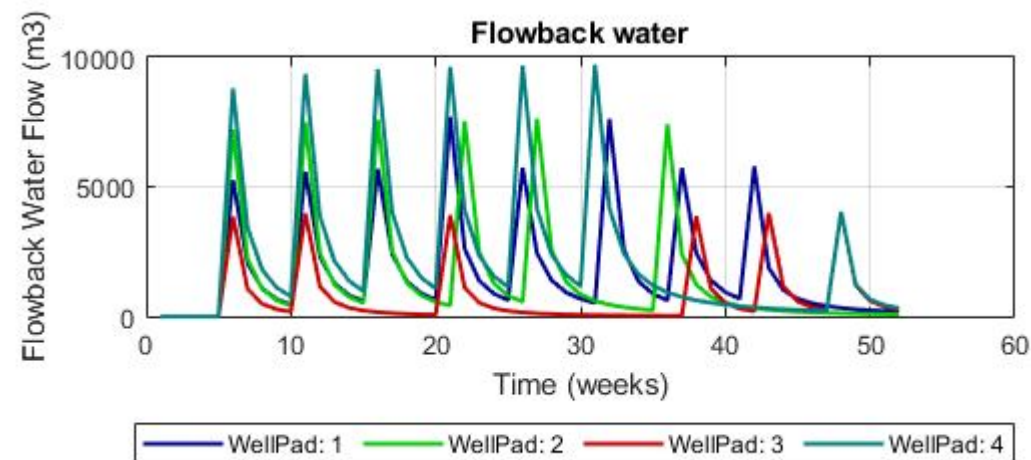

## Water to on-site desalination facility in each wellpad

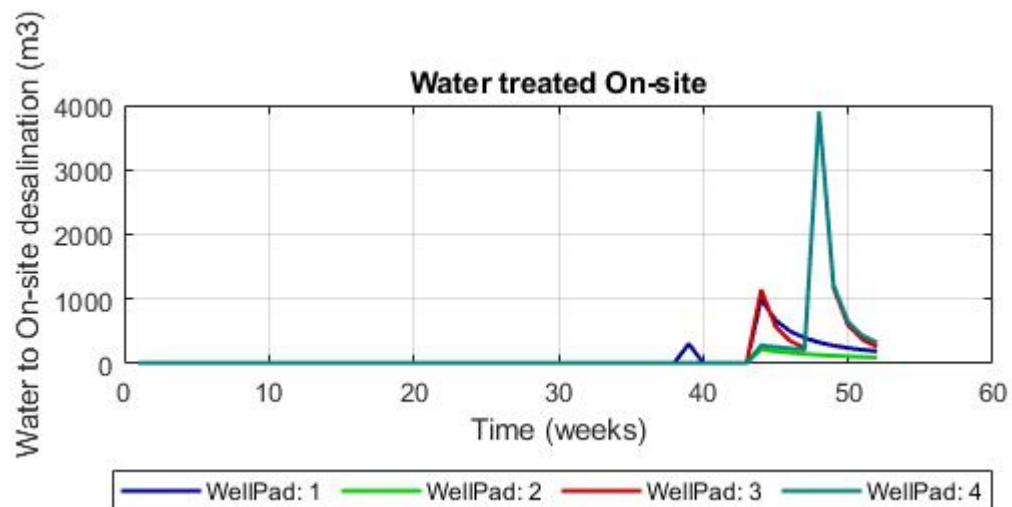

## RESULTS : Gas Production Charts

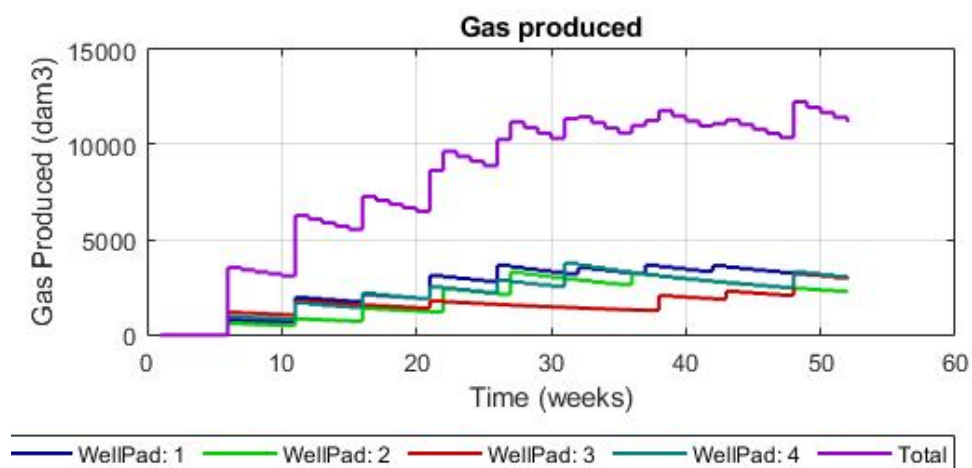

## RESULTS : Cost Distribution

|                                     |   |         |
|-------------------------------------|---|---------|
| Fresh water acquisition cost(k\$)   | : | 402.5   |
| Water transport cost(k\$)           | : | 1213.1  |
| Friction reducers cost(k\$)         | : | 86.5    |
| Fresh water storage cost (k\$)      | : | 118.0   |
| Waste water Storage cost(k\$)       | : | 1083.6  |
| Pre-treatment cost(k\$)             | : | 288.3   |
| On-site desalination cost(k\$)      | : | 347.1   |
| Off-site desalination cost(k\$)     | : | 0.0     |
| Water disposal cost(k\$)            | : | 0.0     |
| Brine and sludge disposal cost(k\$) | : | 169.4   |
| Drilling costs(k\$)                 | : | 7290.0  |
| Gas production cost(k\$)            | : | 5961.2  |
| Total Cost (k\$)                    | : | 16959.7 |
| Total Gas Income (k\$)              | : | 59017.6 |

**Water related Cost Distribution Pie Chart** (drilling and gas production are not included in the chart)

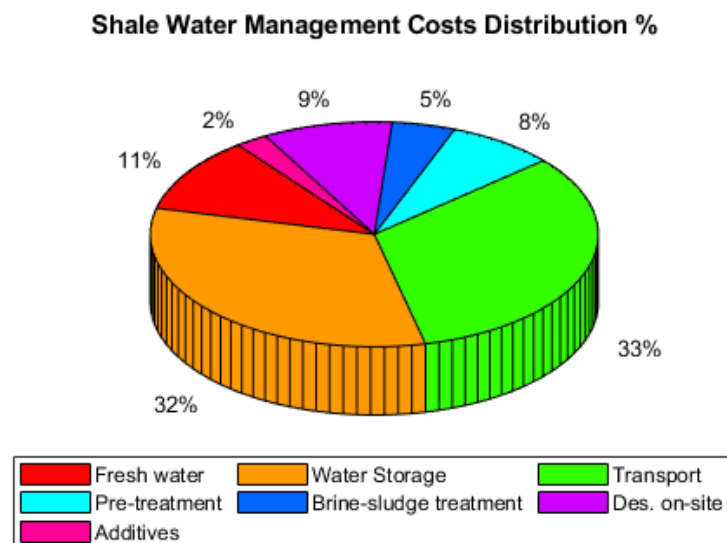

## RESULTS : LCA

### TOTAL ENVIRONMENTAL IMPACT

Environmental Impact (points/dam3·gas) : 0.51885

### DAMAGE CATEGORIES

Ecosystem Quality (points/dam3·gas) : 0.10462

Human Health (points/dam3·gas) : 0.20497

Resources Depletion (points/dam3·gas) : 0.20926

### SUB-DAMAGE CATEGORIES

|                              |         |                 |       |         |                         |
|------------------------------|---------|-----------------|-------|---------|-------------------------|
| Freshwater Ecotoxicity       | 0.00003 | points/dam3·gas | ====> | 0.02404 | kg 1,4-DC               |
| Natural Land Transformation  | 0.00616 | points/dam3·gas | ====> | 0.00163 | m2                      |
| Marine Ecotoxicity           | 0.00001 | points/dam3·gas | ====> | 0.03797 | kg 1,4-DC               |
| Climate Change, Ecosystems   | 0.07545 | points/dam3·gas | ====> | 1.66768 | kg CO <sub>2</sub> -Eq  |
| Terrestrial Acidification    | 0.00029 | points/dam3·gas | ====> | 0.02245 | kg SO <sub>2</sub> -Eq  |
| Terrestrial Ecotoxicity      | 0.00084 | points/dam3·gas | ====> | 0.00255 | kg 1,4-DC               |
| Agricultural Land Occupation | 0.00393 | points/dam3·gas | ====> | 0.10397 | m2                      |
| Freshwater Eutrophication    | 0.00005 | points/dam3·gas | ====> | 0.00043 | kg P-Eq                 |
| Urban Land Occupation        | 0.01785 | points/dam3·gas | ====> | 0.39002 | m2                      |
| Photochem. Oxidant Formation | 0.00129 | points/dam3·gas | ====> | 0.03329 | kg NMVOC                |
| Ozone Depletion              | 0.00004 | points/dam3·gas | ====> | 0.00000 | kg CFC-11               |
| Particulate Matter Formation | 0.06368 | points/dam3·gas | ====> | 0.01226 | kg PM <sub>10</sub> -Eq |
| Ionising Radiation           | 0.00012 | points/dam3·gas | ====> | 0.35672 | kg U235-Eq              |
| Climate Change, Human Health | 0.11938 | points/dam3·gas | ====> | 2.63848 | kg CO <sub>2</sub> -Eq  |
| Human Toxicity               | 0.02046 | points/dam3·gas | ====> | 1.50817 | kg 1,4-DC               |
| Metal Depletion              | 0.01295 | points/dam3·gas | ====> | 0.27896 | kg Fe-Eq                |
| Fossil Depletion             | 0.19632 | points/dam3·gas | ====> | 1.63711 | kg oil-Eq               |

FIGURES LCA

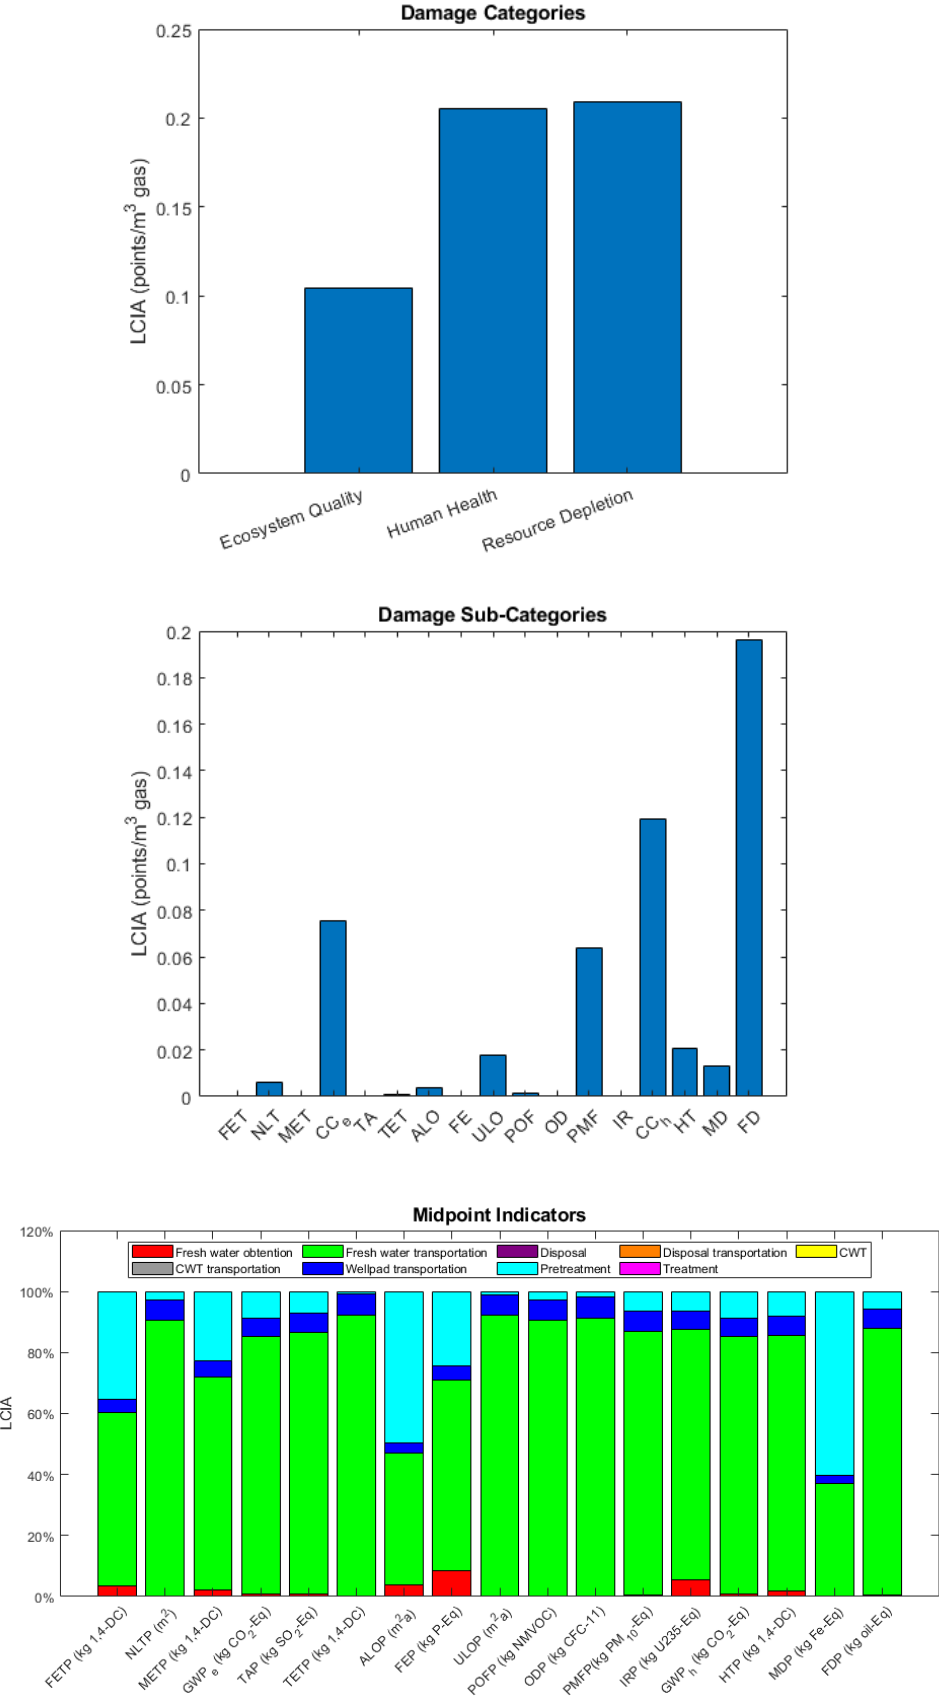

# SHALE GAS WATER MANAGEMENT

=====

Institute of Chemical Process Engineering

University of Alicante

LCA + Water Management Report

---

## BEST ECONOMIC ALTERNATIVE

### RESULTS FOR THE CASE STUDY IN THE PAPER:

«Environmental and Economic Water Management in Shale Gas Extraction»

## CONTENTS

MODEL STATISTICS

RESULTS: SCHEDULING

RESULTS: Storage Tanks. Volumes and Levels

RESULTS: Global data water utilization

RESULTS: Time dependent Water flow charts

RESULTS : Gas Production Charts

RESULTS : Cost Distribution

RESULTS : LCA

## MODEL STATISTICS

|                              |   |            |
|------------------------------|---|------------|
| Number of Variables          | : | 11373.0    |
| Number of Discrete Variables | : | 1165.0     |
| Number of Equations          | : | 9068.0     |
| Number of non-zero elements  | : | 112950.0   |
| Number of Iterations         | : | 25776.0    |
| CPU Generation Time (s)      | : | 0.5940     |
| CPU Solution Time (s)        | : | 3.9380     |
| Model Objective Value        | : | 48643.1019 |

RESULTS: SCHEDULING

The different wells must be schedule according to the following table.

|                       |                         |    |                           |    |
|-----------------------|-------------------------|----|---------------------------|----|
| Well 1 in well pad 1  | Starts fracking at week | 8  | and ends fracking at week | 13 |
| Well 2 in well pad 1  | Starts fracking at week | 37 | and ends fracking at week | 42 |
| Well 3 in well pad 1  | Starts fracking at week | 22 | and ends fracking at week | 27 |
| Well 4 in well pad 1  | Starts fracking at week | 32 | and ends fracking at week | 37 |
| Well 5 in well pad 1  | Starts fracking at week | 43 | and ends fracking at week | 48 |
| Well 6 in well pad 1  | Starts fracking at week | 17 | and ends fracking at week | 22 |
| Well 7 in well pad 1  | Starts fracking at week | 3  | and ends fracking at week | 8  |
| Well 8 in well pad 1  | Starts fracking at week | 27 | and ends fracking at week | 32 |
| Well 9 in well pad 2  | Starts fracking at week | 42 | and ends fracking at week | 47 |
| Well 10 in well pad 2 | Starts fracking at week | 17 | and ends fracking at week | 22 |
| Well 11 in well pad 2 | Starts fracking at week | 37 | and ends fracking at week | 42 |
| Well 12 in well pad 2 | Starts fracking at week | 32 | and ends fracking at week | 37 |
| Well 13 in well pad 2 | Starts fracking at week | 27 | and ends fracking at week | 32 |
| Well 14 in well pad 2 | Starts fracking at week | 22 | and ends fracking at week | 27 |
| Well 15 in well pad 3 | Starts fracking at week | 17 | and ends fracking at week | 22 |
| Well 16 in well pad 3 | Starts fracking at week | 27 | and ends fracking at week | 32 |
| Well 17 in well pad 3 | Starts fracking at week | 42 | and ends fracking at week | 47 |
| Well 18 in well pad 3 | Starts fracking at week | 32 | and ends fracking at week | 37 |
| Well 19 in well pad 3 | Starts fracking at week | 37 | and ends fracking at week | 42 |
| Well 20 in well pad 3 | Starts fracking at week | 22 | and ends fracking at week | 27 |
| Well 21 in well pad 4 | Starts fracking at week | 43 | and ends fracking at week | 48 |
| Well 22 in well pad 4 | Starts fracking at week | 3  | and ends fracking at week | 8  |
| Well 23 in well pad 4 | Starts fracking at week | 17 | and ends fracking at week | 22 |
| Well 24 in well pad 4 | Starts fracking at week | 27 | and ends fracking at week | 32 |
| Well 25 in well pad 4 | Starts fracking at week | 37 | and ends fracking at week | 42 |
| Well 26 in well pad 4 | Starts fracking at week | 22 | and ends fracking at week | 27 |
| Well 27 in well pad 4 | Starts fracking at week | 32 | and ends fracking at week | 37 |

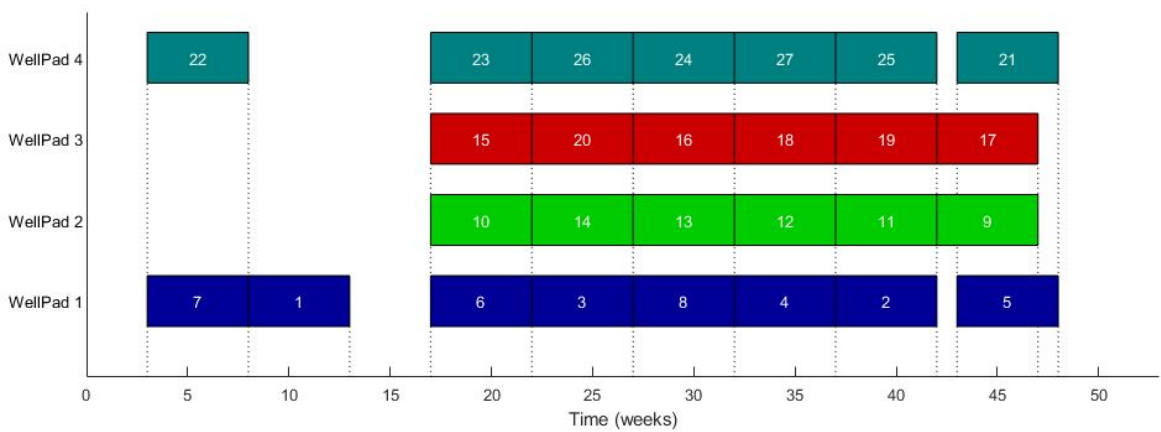

RESULTS: Storage Tanks. Volumes and Levels

Volume of fresh water tanks (m3)

|          |   |   |        |
|----------|---|---|--------|
| Well Pad | 1 | : | 2571.4 |
| Well Pad | 2 | : | 2511.8 |
| Well Pad | 3 | : | 137.1  |
| Well Pad | 4 | : | 2857.1 |

Volume of waste water tanks (m3)

|          |   |   |         |
|----------|---|---|---------|
| Well Pad | 1 | : | 10036.1 |
| Well Pad | 2 | : | 5392.8  |
| Well Pad | 3 | : | 2481.8  |
| Well Pad | 4 | : | 17529.7 |

FRESH Water Tank Level [stairs; regular charts]

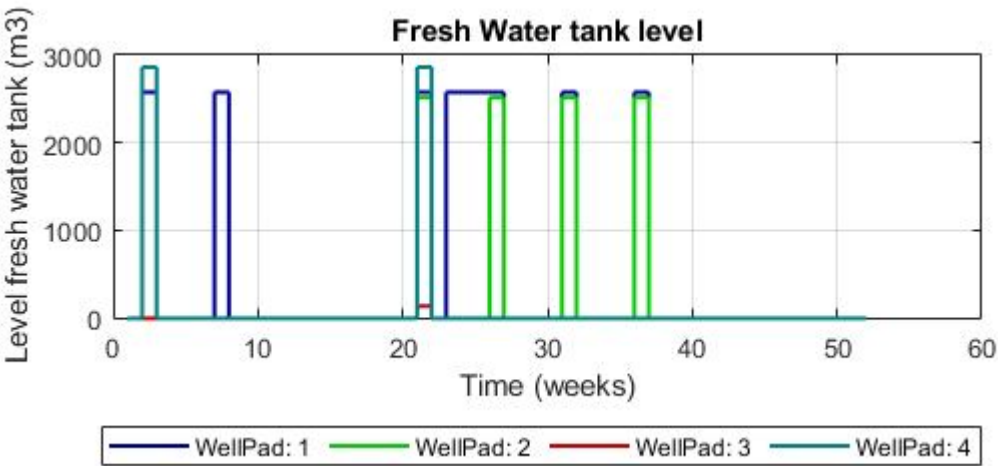

WASTE Water Tank Level

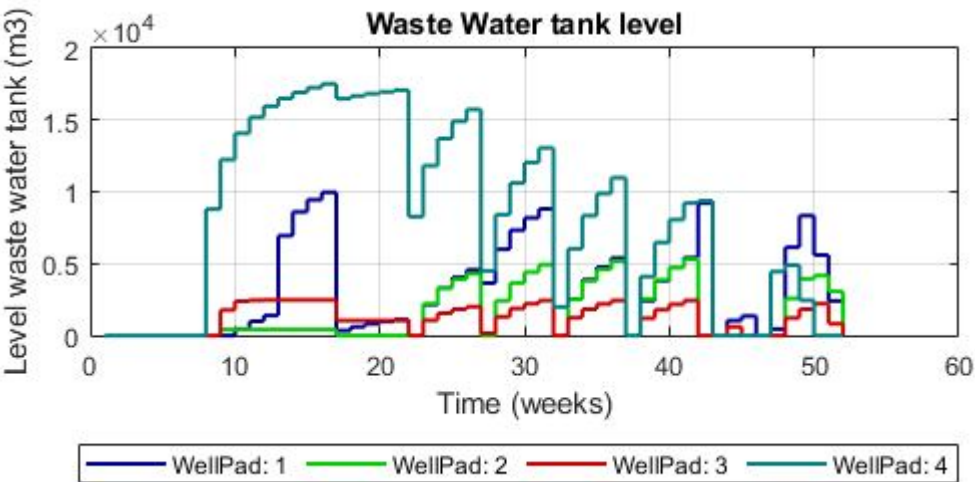

## RESULTS: Main Flows

| Total Flow from each water source to each Well Pad (m3) |            |            |            |            |         |
|---------------------------------------------------------|------------|------------|------------|------------|---------|
|                                                         | Well Pad 1 | Well Pad 2 | Well Pad 3 | Well Pad 4 | Total   |
| Source 1 :                                              | 88714.6    | 0.0        | 1920.0     | 0.0        | 90634.6 |
| Source 2 :                                              | 0.0        | 0.0        | 0.0        | 0.0        | 0.0     |
| Source 3 :                                              | 0.0        | 46594.3    | 0.0        | 41665.0    | 88259.2 |
| Total                                                   | 88714.6    | 46594.3    | 1920.0     | 41665.0    | 41665.0 |

### Total fresh water demand of each well pad (m3)

|              |          |
|--------------|----------|
| Well Pad 1 : | 126000.0 |
| Well Pad 2 : | 108000.0 |
| Well Pad 3 : | 72000.0  |
| Well Pad 4 : | 132000.0 |
| Total :      | 438000.0 |

### Total flowback water in each well pad (m3)

|              |          |
|--------------|----------|
| Well Pad 1 : | 89122.9  |
| Well Pad 2 : | 76235.8  |
| Well Pad 3 : | 38232.4  |
| Well Pad 4 : | 118500.7 |
| Total :      | 322091.9 |

### Total flowback recycled by each well pad (m3)

|              |          |
|--------------|----------|
| Well Pad 1 : | 37285.4  |
| Well Pad 2 : | 61405.7  |
| Well Pad 3 : | 70080.0  |
| Well Pad 4 : | 90335.0  |
| Total :      | 259106.2 |

### Total flow treated on-site in each well pad(m3)

|              |         |
|--------------|---------|
| Well Pad 1 : | 16210.8 |
| Well Pad 2 : | 0.0     |
| Well Pad 3 : | 0.0     |
| Well Pad 4 : | 37112.1 |
| Total :      | 53322.9 |

### Total flow sent to a C. W. T by each well pad(m3)

|              |     |
|--------------|-----|
| Well Pad 1 : | 0.0 |
| Well Pad 2 : | 0.0 |
| Well Pad 3 : | 0.0 |
| Well Pad 4 : | 0.0 |
| Total :      | 0.0 |

### Total flow sent to disposal by each well pad(m3)

|              |     |
|--------------|-----|
| Well Pad 1 : | 0.0 |
| Well Pad 2 : | 0.0 |
| Well Pad 3 : | 0.0 |
| Well Pad 4 : | 0.0 |
| Total :      | 0.0 |

### Total flow recycled between well pads (m3)

|              | Well Pad 1 | Well Pad 2 | Well Pad 3 | Well Pad 4 |
|--------------|------------|------------|------------|------------|
| Well Pad 1 : | 0.0        | 430.2      | 39315.5    | 3081.5     |
| Well Pad 2 : | 2571.8     | 0.0        | 0.0        | 16393.3    |
| Well Pad 3 : | 6283.3     | 0.0        | 0.0        | 2945.0     |
| Well Pad 4 : | 0.0        | 5603.9     | 3927.7     | 0.0        |

RESULTS: Global data water utilization

|                                        |   |          |
|----------------------------------------|---|----------|
| Total water demanded by Well Pads (m3) | : | 438000.0 |
| Total fresh water consumption (m3)     | : | 178893.8 |
| Total flowback water (m3)              | : | 322091.9 |
| Total flowback water recycled (m3)     | : | 259106.2 |
| Total sludge generated (m3)            | : | 9662.8   |
| Total water desalinated on-site (m3)   | : | 53322.9  |
| Total water desalinated off-site (m3)  | : | 0.0      |
| Total water send to disposal (m3)      | : | 0.0      |
| Percentage of fresh water saved (%)    | : | 59.2     |

RESULTS: Time dependent Water flow charts

Total fresh water consumed in each wellpad

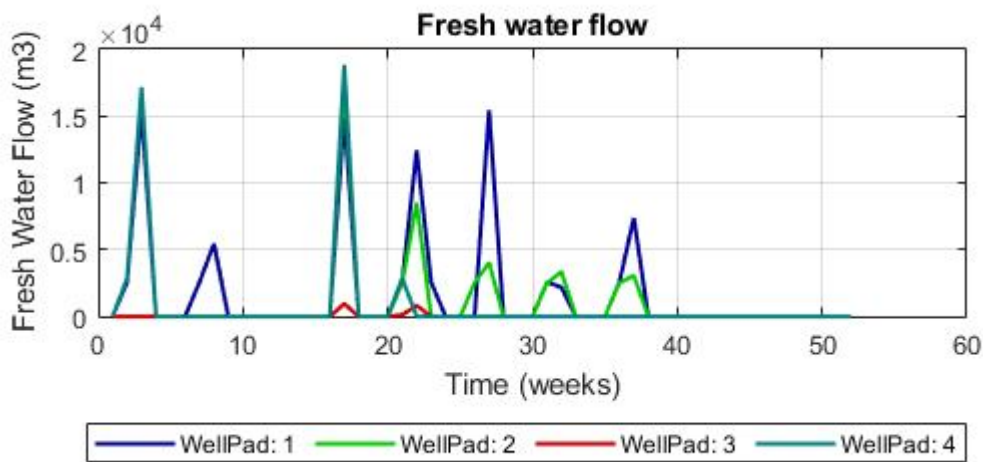

Total flowback water produced in each wellpad

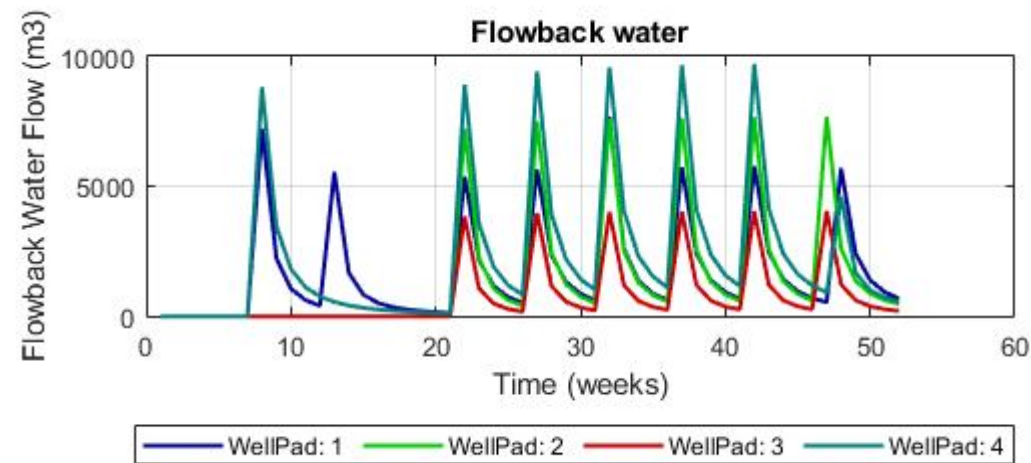

### Water to on-site desalination facility in each wellpad

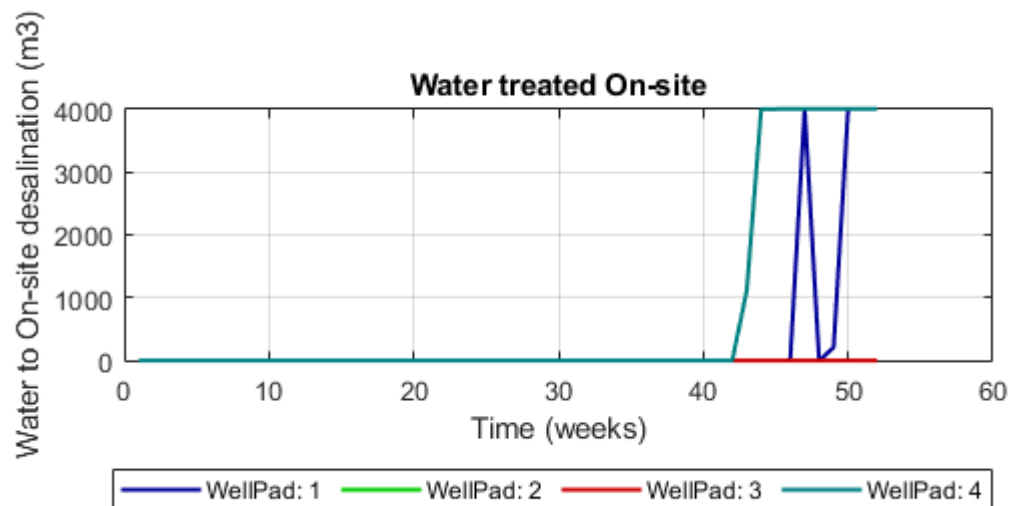

### RESULTS : Gas Production Charts

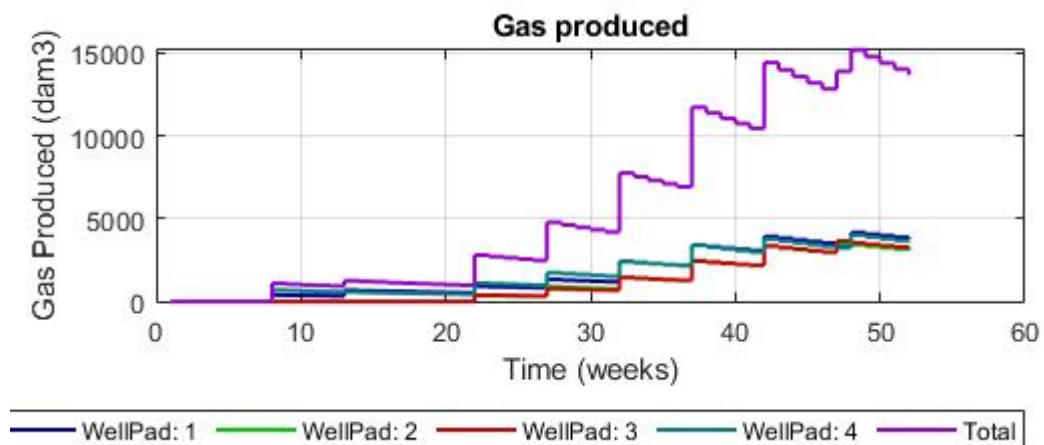

## RESULTS : Cost Distribution

|                                     |   |         |
|-------------------------------------|---|---------|
| Fresh water acquisition cost(k\$)   | : | 498.8   |
| Water transport cost(k\$)           | : | 1117.8  |
| Friction reducers cost(k\$)         | : | 75.1    |
| Fresh water storage cost (k\$)      | : | 4.8     |
| Waste water Storage cost(k\$)       | : | 364.4   |
| Pre-treatment cost(k\$)             | : | 325.6   |
| On-site desalination cost(k\$)      | : | 203.7   |
| Off-site desalination cost(k\$)     | : | 0.0     |
| Water disposal cost(k\$)            | : | 0.0     |
| Brine and sludge disposal cost(k\$) | : | 243.9   |
| Drilling costs(k\$)                 | : | 7290.0  |
| Gas production cost(k\$)            | : | 4147.9  |
| Total Cost (k\$)                    | : | 14272.0 |
| Total Gas Income (k\$)              | : | 62915.1 |

**Water related Cost Distribution Pie Chart** (drilling and gas production are not included in the chart)

**Shale Water Management Costs Distribution %**

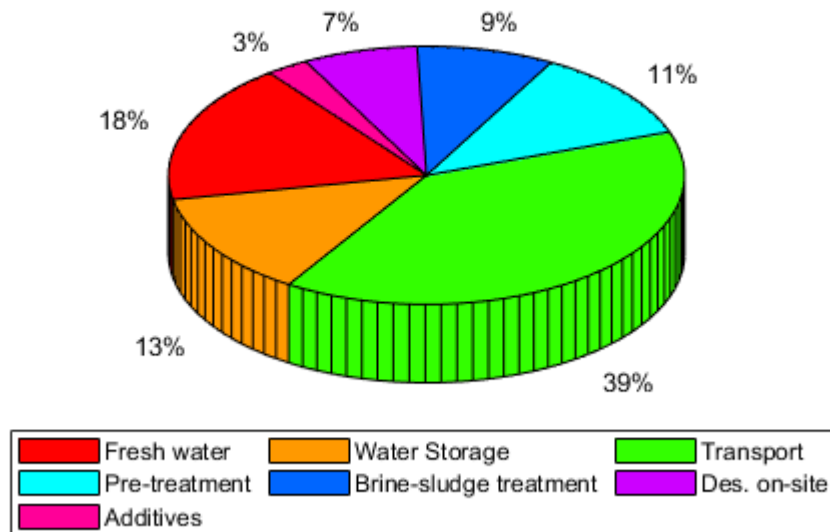

## RESULTS : LCA

### TOTAL ENVIRONMENTAL IMPACT

Environmental Impact (points/dam3·gas) : 0.63906

### DAMAGE CATEGORIES

Ecosystem Quality (points/dam3·gas) : 0.12884  
Human Health (points/dam3·gas) : 0.25221  
Resources Depletion (points/dam3·gas) : 0.25802

### SUB-DAMAGE CATEGORIES

|                              |                         |       |                    |
|------------------------------|-------------------------|-------|--------------------|
| Freshwater Ecotoxicity       | 0.00004 points/dam3·gas | ====> | 0.03114 kg 1,4-DC  |
| Natural Land Transformation  | 0.00749 points/dam3·gas | ====> | 0.00199 m2         |
| Marine Ecotoxicity           | 0.00002 points/dam3·gas | ====> | 0.04805 kg 1,4-DC  |
| Climate Change, Ecosystems   | 0.09297 points/dam3·gas | ====> | 2.05471 kg CO2-Eq  |
| Terrestrial Acidification    | 0.00035 points/dam3·gas | ====> | 0.02757 kg SO2-Eq  |
| Terrestrial Ecotoxicity      | 0.00102 points/dam3·gas | ====> | 0.00309 kg 1,4-DC  |
| Agricultural Land Occupation | 0.00522 points/dam3·gas | ====> | 0.13825 m2         |
| Freshwater Eutrophication    | 0.00006 points/dam3·gas | ====> | 0.00055 kg P-Eq    |
| Urban Land Occupation        | 0.02167 points/dam3·gas | ====> | 0.47347 m2         |
| Photochem. Oxidant Formation | 0.00160 points/dam3·gas | ====> | 0.04054 kg NMVOC   |
| Ozone Depletion              | 0.00005 points/dam3·gas | ====> | 0.00000 kg CFC-11  |
| Particulate Matter Formation | 0.07813 points/dam3·gas | ====> | 0.01505 kg PM10-Eq |
| Ionising Radiation           | 0.00014 points/dam3·gas | ====> | 0.43868 kg U235-Eq |
| Climate Change, Human Health | 0.14708 points/dam3·gas | ====> | 3.25081 kg CO2-Eq  |
| Human Toxicity               | 0.02520 points/dam3·gas | ====> | 1.85754 kg 1,4-DC  |
| Metal Depletion              | 0.01748 points/dam3·gas | ====> | 0.37656 kg Fe-Eq   |
| Fossil Depletion             | 0.24054 points/dam3·gas | ====> | 2.00593 kg oil-Eq  |

FIGURES LCA

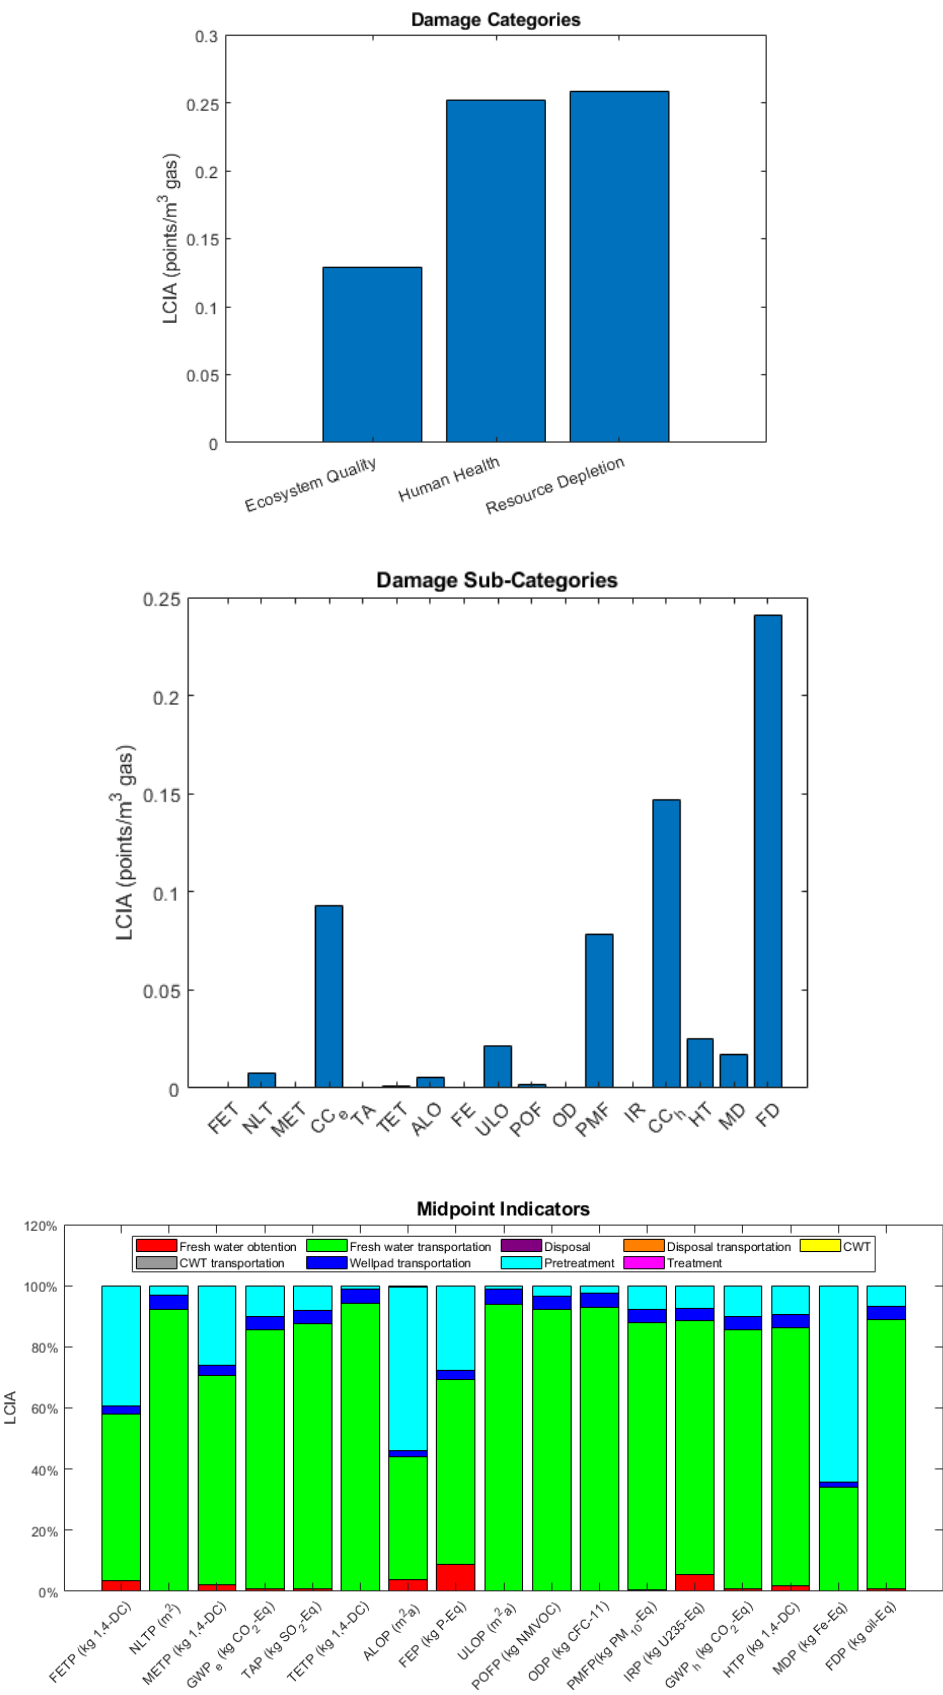

# SHALE GAS WATER MANAGEMENT

=====

Institute of Chemical Process Engineering

University of Alicante

LCA + Water Management Report

=====

## MINIMUM FRESH WATER CONSUMPTION ALTERNATIVE

### RESULTS FOR THE CASE STUDY IN THE PAPER:

«Environmental and Economic Water Management in Shale Gas Extraction»

## CONTENTS

MODEL STATISTICS

RESULTS: SCHEDULING

RESULTS: Storage Tanks. Volumes and Levels

RESULTS: Main Flows

RESULTS: Global data water utilization

RESULTS: Time dependent Water flow charts

RESULTS : Gas Production Charts

RESULTS : Cost Distribution

RESULTS : LCA

## MODEL STATISTICS

|                              |   |             |
|------------------------------|---|-------------|
| Number of Variables          | : | 11373.0     |
| Number of Discrete Variables | : | 1165.0      |
| Number of Equations          | : | 9068.0      |
| Number of non-zero elements  | : | 112950.0    |
| Number of Iterations         | : | 991149.0    |
| CPU Generation Time (s)      | : | 0.5940      |
| CPU Solution Time (s)        | : | 122.5790    |
| Model Objective Value        | : | 138897.1536 |

RESULTS: SCHEDULING

The different wells must be schedule according to the following table.

|                       |                         |    |                           |    |
|-----------------------|-------------------------|----|---------------------------|----|
| Well 1 in well pad 1  | Starts fracking at week | 38 | and ends fracking at week | 43 |
| Well 2 in well pad 1  | Starts fracking at week | 11 | and ends fracking at week | 16 |
| Well 3 in well pad 1  | Starts fracking at week | 21 | and ends fracking at week | 26 |
| Well 4 in well pad 1  | Starts fracking at week | 16 | and ends fracking at week | 21 |
| Well 5 in well pad 1  | Starts fracking at week | 6  | and ends fracking at week | 11 |
| Well 6 in well pad 1  | Starts fracking at week | 1  | and ends fracking at week | 6  |
| Well 7 in well pad 1  | Starts fracking at week | 33 | and ends fracking at week | 38 |
| Well 8 in well pad 1  | Starts fracking at week | 28 | and ends fracking at week | 33 |
| Well 9 in well pad 2  | Starts fracking at week | 23 | and ends fracking at week | 28 |
| Well 10 in well pad 2 | Starts fracking at week | 6  | and ends fracking at week | 11 |
| Well 11 in well pad 2 | Starts fracking at week | 16 | and ends fracking at week | 21 |
| Well 12 in well pad 2 | Starts fracking at week | 1  | and ends fracking at week | 6  |
| Well 13 in well pad 2 | Starts fracking at week | 31 | and ends fracking at week | 36 |
| Well 14 in well pad 2 | Starts fracking at week | 11 | and ends fracking at week | 16 |
| Well 15 in well pad 3 | Starts fracking at week | 36 | and ends fracking at week | 41 |
| Well 16 in well pad 3 | Starts fracking at week | 1  | and ends fracking at week | 6  |
| Well 17 in well pad 3 | Starts fracking at week | 6  | and ends fracking at week | 11 |
| Well 18 in well pad 3 | Starts fracking at week | 11 | and ends fracking at week | 16 |
| Well 19 in well pad 3 | Starts fracking at week | 43 | and ends fracking at week | 48 |
| Well 20 in well pad 3 | Starts fracking at week | 17 | and ends fracking at week | 22 |
| Well 21 in well pad 4 | Starts fracking at week | 41 | and ends fracking at week | 46 |
| Well 22 in well pad 4 | Starts fracking at week | 21 | and ends fracking at week | 26 |
| Well 23 in well pad 4 | Starts fracking at week | 6  | and ends fracking at week | 11 |
| Well 24 in well pad 4 | Starts fracking at week | 1  | and ends fracking at week | 6  |
| Well 25 in well pad 4 | Starts fracking at week | 11 | and ends fracking at week | 16 |
| Well 26 in well pad 4 | Starts fracking at week | 26 | and ends fracking at week | 31 |
| Well 27 in well pad 4 | Starts fracking at week | 16 | and ends fracking at week | 21 |

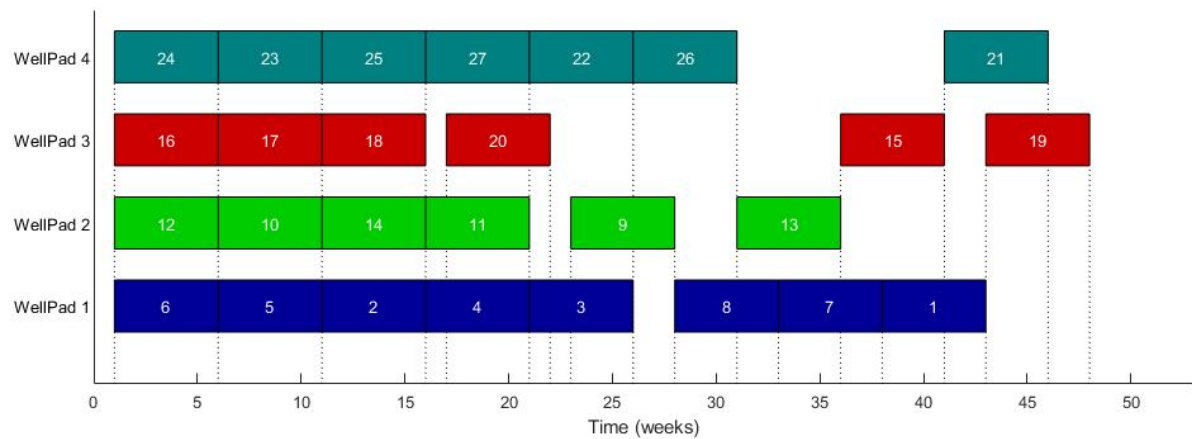

RESULTS: Storage Tanks. Volumes and Levels

Volume of fresh water tanks (m3)

|          |   |   |         |
|----------|---|---|---------|
| Well Pad | 1 | : | 50000.0 |
| Well Pad | 2 | : | 50000.0 |
| Well Pad | 3 | : | 50000.0 |
| Well Pad | 4 | : | 50000.0 |

Volume of waste water tanks (m3)

|          |   |   |         |
|----------|---|---|---------|
| Well Pad | 1 | : | 50000.0 |
| Well Pad | 2 | : | 50000.0 |
| Well Pad | 3 | : | 50000.0 |
| Well Pad | 4 | : | 50000.0 |

FRESH Water Tank Level

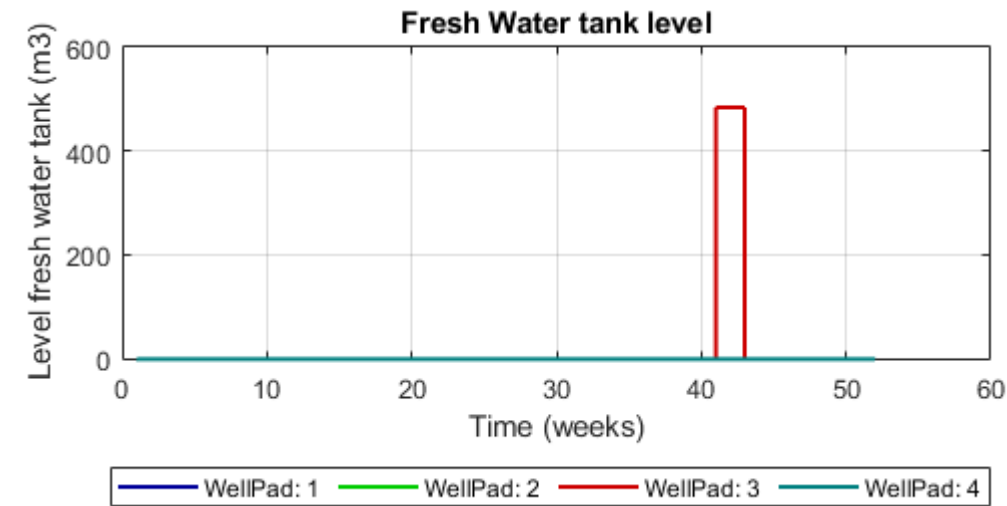

WASTE Water Tank Level

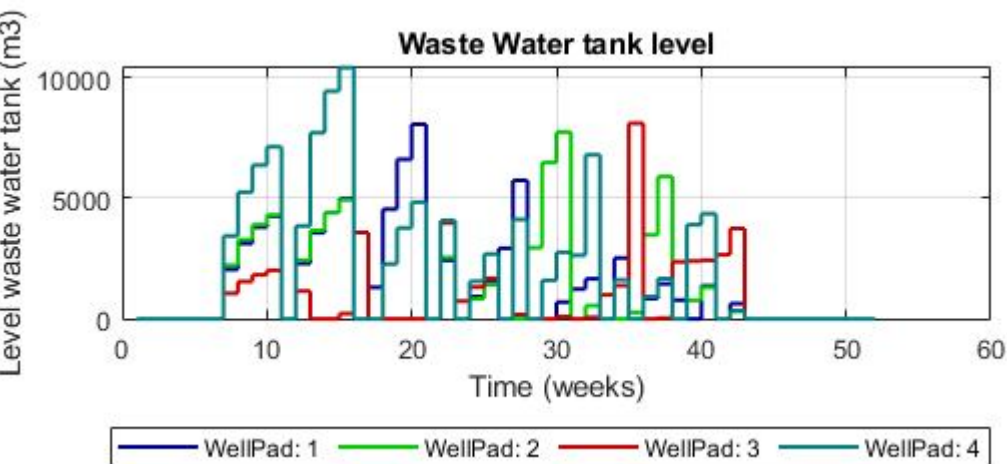

## RESULTS: Main Flows

Total Flow from each water source to each Well Pad (m3)

|            | Well Pad 1 | Well Pad 2 | Well Pad 3 | Well Pad 4 | Total    |
|------------|------------|------------|------------|------------|----------|
| Source 1 : | 0.0        | 0.0        | 483.0      | 0.0        | 483.0    |
| Source 2 : | 0.0        | 0.0        | 0.0        | 0.0        | 0.0      |
| Source 3 : | 24907.5    | 39559.4    | 31930.0    | 42017.2    | 138414.1 |
| Total      | 24907.5    | 39559.4    | 32413.0    | 42017.2    |          |

Total fresh water demand of each well pad (m3)

|              |          |
|--------------|----------|
| Well Pad 1 : | 126000.0 |
| Well Pad 2 : | 108000.0 |
| Well Pad 3 : | 72000.0  |
| Well Pad 4 : | 132000.0 |
| Total :      | 438000.0 |

Total flowback water in each well pad (m3)

|              |          |
|--------------|----------|
| Well Pad 1 : | 91596.1  |
| Well Pad 2 : | 78609.0  |
| Well Pad 3 : | 38483.7  |
| Well Pad 4 : | 121070.7 |
| Total :      | 329759.5 |

Total flowback recycled by each well pad (m3)

|              |          |
|--------------|----------|
| Well Pad 1 : | 101092.5 |
| Well Pad 2 : | 68440.6  |
| Well Pad 3 : | 39587.0  |
| Well Pad 4 : | 89982.8  |
| Total :      | 299102.9 |

Total flow treated on-site in each well pad(m3)

|              |         |
|--------------|---------|
| Well Pad 1 : | 5184.4  |
| Well Pad 2 : | 1196.6  |
| Well Pad 3 : | 6728.6  |
| Well Pad 4 : | 7654.3  |
| Total :      | 20763.8 |

Total flow sent to a C.W.T by each well pad(m3)

|              |     |
|--------------|-----|
| Well Pad 1 : | 0.0 |
| Well Pad 2 : | 0.0 |
| Well Pad 3 : | 0.0 |
| Well Pad 4 : | 0.0 |
| Total :      | 0.0 |

Total flow sent to disposal by each well pad(m3)

|              |     |
|--------------|-----|
| Well Pad 1 : | 0.0 |
| Well Pad 2 : | 0.0 |
| Well Pad 3 : | 0.0 |
| Well Pad 4 : | 0.0 |
| Total :      | 0.0 |

Total flow recycled between well pads (m3)

|              | Well Pad 1 | Well Pad 2 | Well Pad 3 | Well Pad 4 |
|--------------|------------|------------|------------|------------|
| Well Pad 1 : | 0.0        | 4790.5     | 11290.4    | 10081.5    |
| Well Pad 2 : | 17129.2    | 0.0        | 11789.7    | 10417.0    |
| Well Pad 3 : | 12132.2    | 4711.8     | 0.0        | 7635.4     |
| Well Pad 4 : | 14868.6    | 23015.4    | 10663.7    | 0.0        |

RESULTS: Global data water utilization

|                                        |            |
|----------------------------------------|------------|
| Total water demanded by Well Pads (m3) | : 438000.0 |
| Total fresh water consumption (m3)     | : 138897.1 |
| Total flowback water (m3)              | : 329759.5 |
| Total flowback water recycled (m3)     | : 299102.9 |
| Total sludge generated (m3)            | : 9892.8   |
| Total water desalinated on-site (m3)   | : 20763.8  |
| Total water desalinated off-site (m3)  | : 0.0      |
| Total water send to disposal (m3)      | : 0.0      |
| Percentage of fresh water saved (%)    | : 68.3     |

RESULTS: Time dependent Water flow charts

Total fresh water consumed in each wellpad

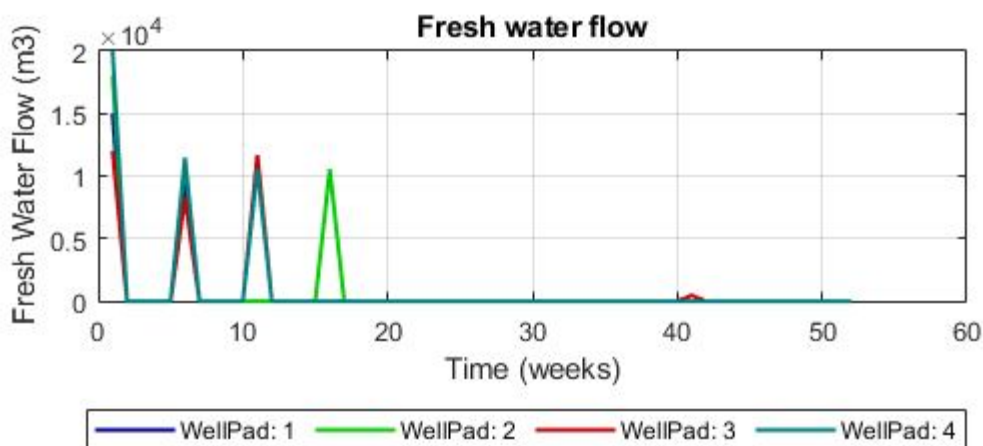

Total flowback water produced in each wellpad

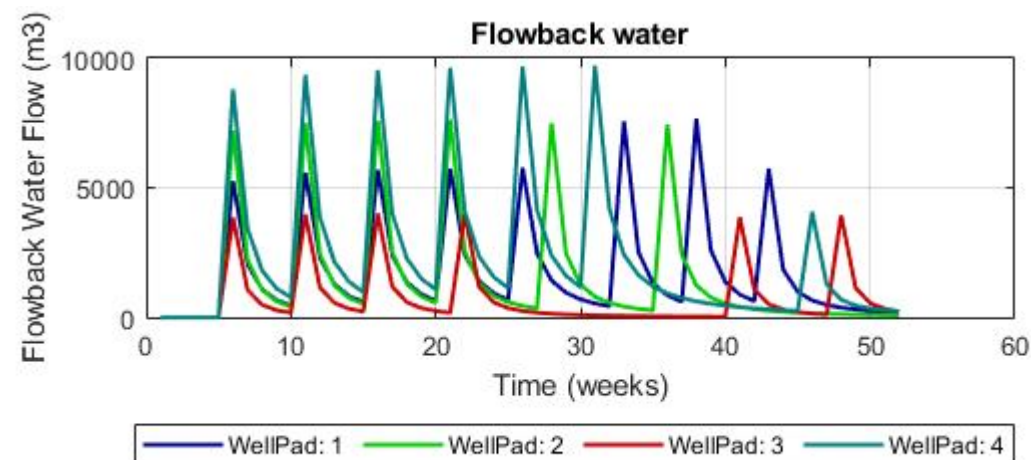

### Water to on-site desalination facility in each wellpad

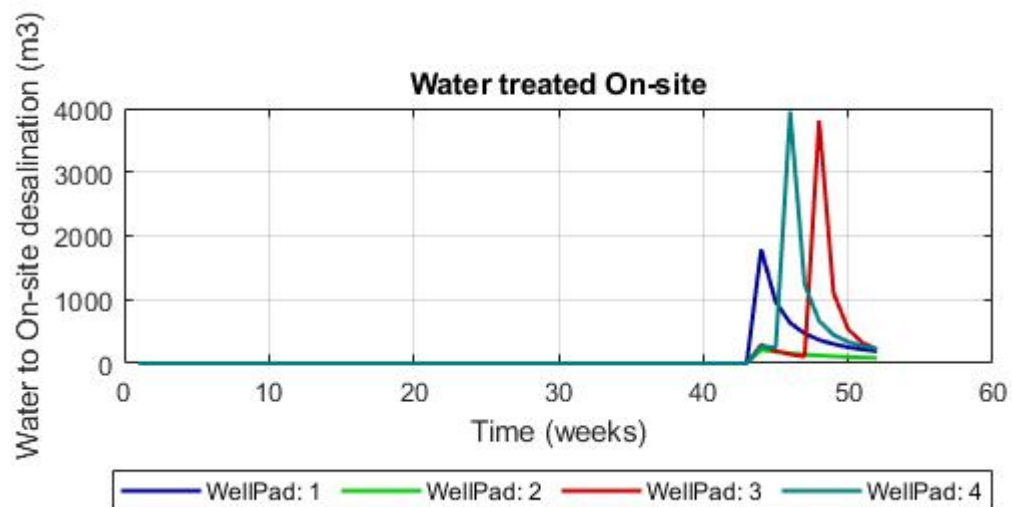

### RESULTS : Gas Production Charts

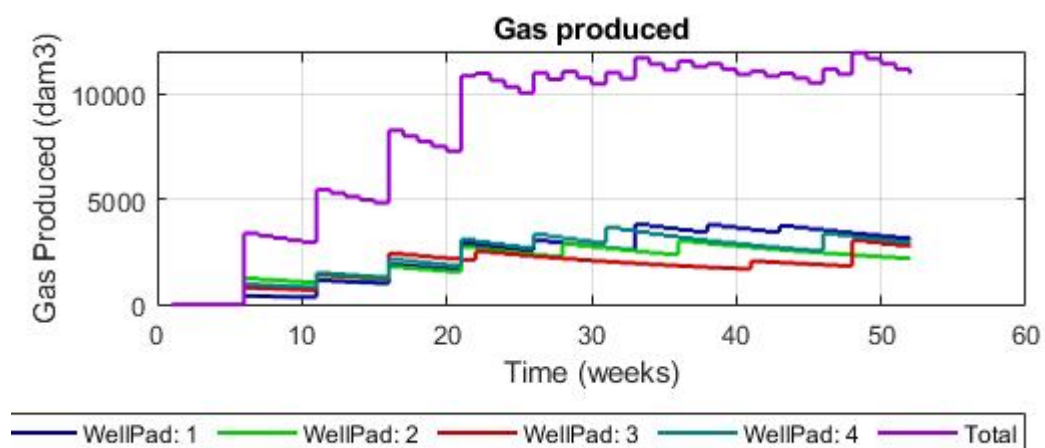

## RESULTS : Cost Distribution

|                                     |   |         |
|-------------------------------------|---|---------|
| Fresh water adq uisition cost(k\$)  | : | 408.2   |
| Water transport cost(k\$)           | : | 1483.8  |
| Friction reducers cost(k\$)         | : | 86.7    |
| Fresh water storage cost (k\$)      | : | 118.0   |
| Waste water Storage cost(k\$)       | : | 1083.6  |
| Pre-treatment cost(k\$)             | : | 288.1   |
| On-site desalination cost(k\$)      | : | 323.0   |
| Off-site desalination cost(k\$)     | : | 0.0     |
| Water disposal cost(k\$)            | : | 0.0     |
| Brine and sludge disposal cost(k\$) | : | 168.5   |
| Drilling costs(k\$)                 | : | 7290.0  |
| Gas production cost(k\$)            | : | 6050.9  |
| Total Cost (k\$)                    | : | 17300.9 |
| Total Gas Income (k\$)              | : | 58593.7 |

**Water related Cost Distribution Pie Chart** (drilling and gas production are not included in the chart)

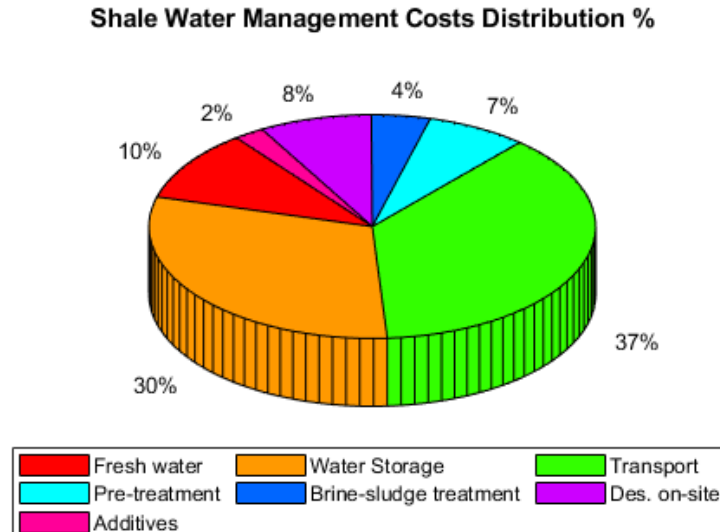

## RESULTS : LCA

### TOTAL ENVIRONMENTAL IMPACT

Environmental Impact (points/dam3· gas) : 0.54656

### DAMAGE CATEGORIES

Ecosystem Quality (points/dam3· gas) : 0.11022  
Human Health (points/dam3· gas) : 0.21597  
Resources Depletion (points/dam3· gas) : 0.22037

### SUB-DAMAGE CATEGORIES

|                              |                          |       |         |    |                      |
|------------------------------|--------------------------|-------|---------|----|----------------------|
| Freshwater Ecotoxicity       | 0.00003 points/dam3· gas | ====> | 0.02487 | kg | 1,4-DC               |
| Natural Land Transformation  | 0.00652 points/dam3· gas | ====> | 0.00173 | m2 |                      |
| Marine Ecotoxicity           | 0.00001 points/dam3· gas | ====> | 0.03962 | kg | 1,4-DC               |
| Climate Change, Ecosystems   | 0.07947 points/dam3· gas | ====> | 1.75645 | kg | CO <sub>2</sub> -Eq  |
| Terrestrial Acidification    | 0.00030 points/dam3· gas | ====> | 0.02367 | kg | SO <sub>2</sub> -Eq  |
| Terrestrial Ecotoxicity      | 0.00089 points/dam3· gas | ====> | 0.00270 | kg | 1,4-DC               |
| Agricultural Land Occupation | 0.00404 points/dam3· gas | ====> | 0.10654 | m2 |                      |
| Freshwater Eutrophication    | 0.00005 points/dam3· gas | ====> | 0.00044 | kg | P-Eq                 |
| Urban Land Occupation        | 0.01890 points/dam3· gas | ====> | 0.41288 | m2 |                      |
| Photochem. Oxidant Formation | 0.00136 points/dam3· gas | ====> | 0.03520 | kg | NM VOC               |
| Ozone Depletion              | 0.00004 points/dam3· gas | ====> | 0.00000 | kg | CFC-11               |
| Particulate Matter Formation | 0.06716 points/dam3· gas | ====> | 0.01293 | kg | PM <sub>10</sub> -Eq |
| Ionising Radiation           | 0.00012 points/dam3· gas | ====> | 0.37521 | kg | U235-Eq              |
| Climate Change, Human Health | 0.12573 points/dam3· gas | ====> | 2.77893 | kg | CO <sub>2</sub> -Eq  |
| Human Toxicity               | 0.02155 points/dam3· gas | ====> | 1.58815 | kg | 1,4-DC               |
| Metal Depletion              | 0.01321 points/dam3· gas | ====> | 0.28467 | kg | Fe-Eq                |
| Fossil Depletion             | 0.20716 points/dam3· gas | ====> | 1.72753 | kg | oil-Eq               |

FIGURES LCA

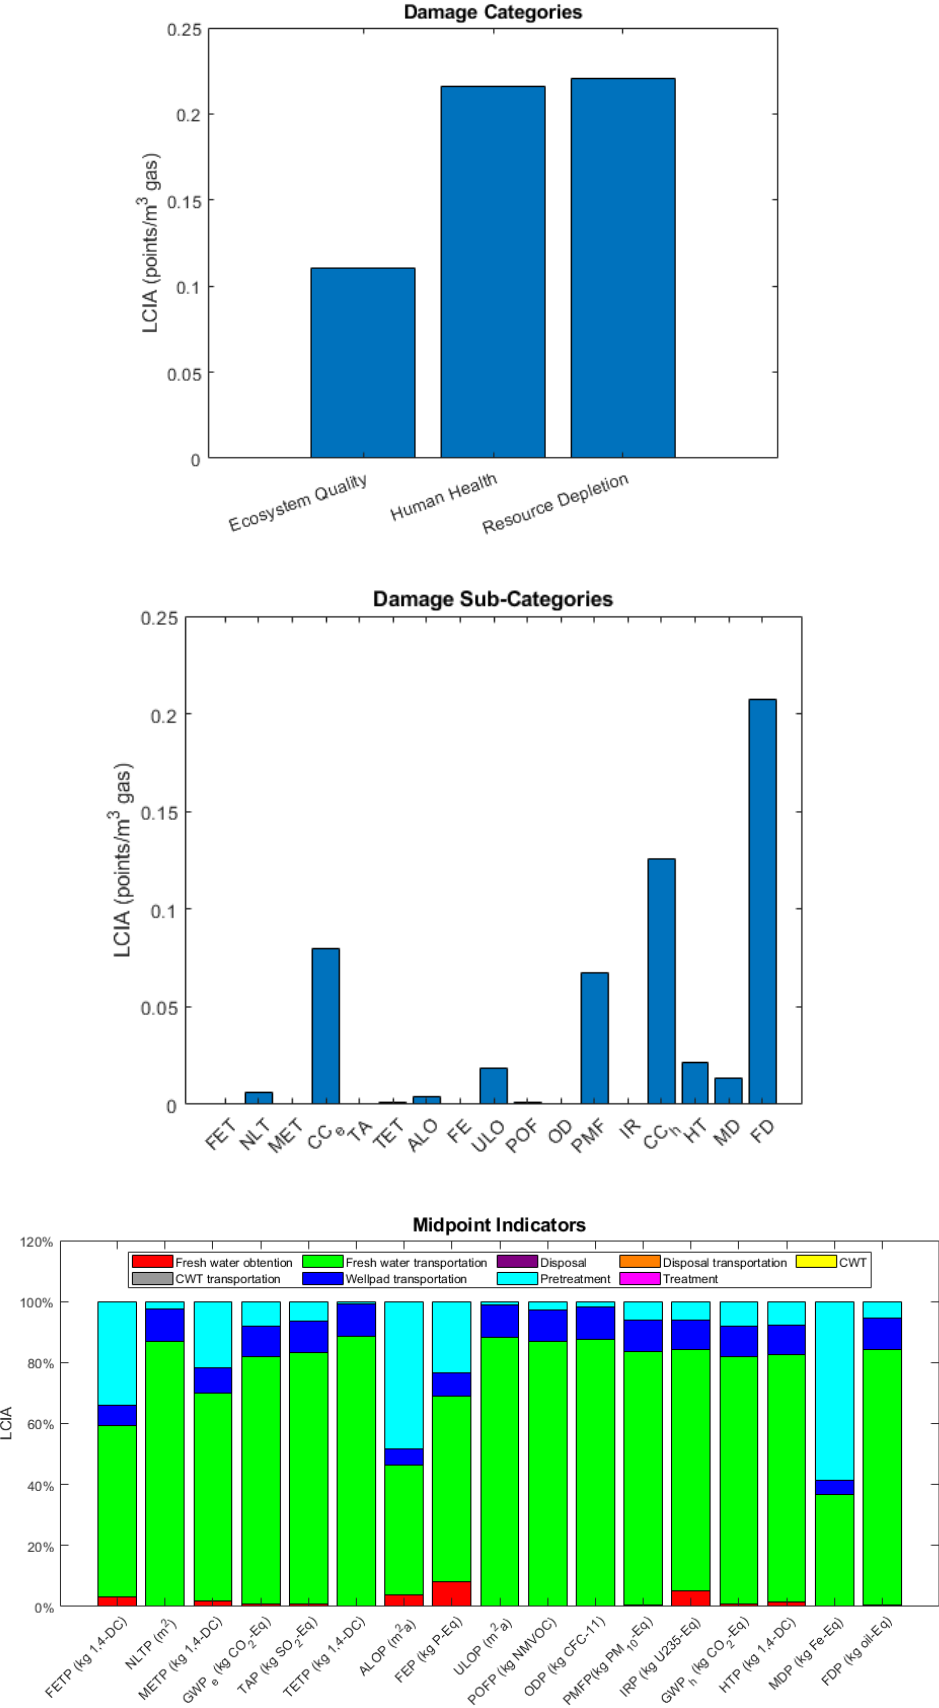

Supplement: s1 [file s1]
